# Supplementary material for: A cotton miRNA is involved in regulation of plant response to salt stress
Source: PubMed Central journal article supplement (PMC4728436; doi:10.1038/srep19736), 2016-01-27
Supplement: srep19736-s1.pdf [file srep19736-s1.pdf]

## Supplementary Data

**Title of article:** A cotton miRNA is involved in regulation of plant response to salt stress

**Running head:** miRNVL5 and *GhCHR* involved in plant salt stress response

**Full names of all authors:** <sup>1\*</sup>Shuai Gao, <sup>1\*</sup>Lu Yang, <sup>5</sup>Hou Qing Zeng, <sup>2</sup>Zhao Sheng Zhou, <sup>1</sup>Zhi Min Yang, <sup>1,3</sup>Hua Li, <sup>1,6</sup>Di Sun, <sup>4</sup>Fuliang Xie,  
<sup>4</sup>Baohong Zhang

**Supplementary Data S1. Sequences of mature miRNVL5 (red) and its precursor (yellow)**

Primary transcripts of miRNVL5

GATCTGGGCTTGGGTGCCTATAAATTCTTTAGGGGAAAAAGTAGGGCATCAGAGTGTATAGCCGAATATGCAAAAAGGCGAGGG  
TGAGGGTGGAGTTTGAATCAAACAAGAAAATCATATTCTTACCTTCTTTTCTTCACAAATATCACAATAAAACATGGATGAAACT  
ATCGATGCCCAAAGCTGCCTCTTGTATCGATGATAGAGTTCTATTATTGTGATATTAGTGAGGAACAAAAGGTATTGATATGAGG  
TCGACGGCCATGACCAGATTCTGTCGGATATACACTCACCGTGTGCTGCGTACTGCTTTATTATCTTTGCCTC

Pre-miRNVL5

UUUCUUCACAAAUAUCACAAUAAAACAUGGAUGAAACUAUCGAUGCCCAAAGCUGCCUCUUGUAUCGAUGAUAGAGUUCUAU

UAUUGUGAUUUAGUGAGGAAC

Mature miRNVL5

UUUCUUCACAAAUAUCACAAUA

## Supplementary Data S2. Sequences of *GhCHR* and deduced amino acids of GhCHR

### A: Sequences of *GhCHR* cDNA

ATGCTCTCGATCATTATATTCTTCACTTGTAATCTTGCTTTGGACTCTCTCTCTCTTTCCAATTTGTAATACTTCAAACATTGAGTTTCAGTTTTTTCTTCC  
TACGTCAATGCAAAAAACCAAAGAGGAAGGAGAAAATGGAGGAGTCTAACAATTATGGCCACCAACATCCCCTGCTTCTTATCTTGAATCAAGACCAGCTGATC  
CACAATCAAAGTGGTGTAACCTCATTGCTCCAGGTGTGGGAGAAAGGTGTCTGCTCCATGTTTTTGTGTGCGGAGCGCTGTGGGTTTTATGTCCACAAGGTATG  
TGCCGAGGCACCTTTGGAGCTTAATCATCCTTTTCATACTCATCATCCTCTTCTTCTTATGCAAAATGCCCTTATTCATCTGGACGGTACATTTGCAATTTTGGC  
ATAAAGACGGTAGTAAGTTTGTATCACTGCTCTTGGGATTGGACTTTCATATTAATGTGCTTTGTTTACATTTAATATTGCTGAGAATAATTTGAAAGAGCTT  
GACCATGTTGCCCTTCAACATCCTTTGATTTCCACTGAAAACGGTGATGAAGAAGTTGGAGACGTTAGTAAGTGCTTTGGATGTTGGGAACCATTAGCAAAGTA  
TACACACTTTTCTCTGACTGTGGATTTAATTTCCATGAGAAATGCGCTAAGCTTCTTTCAAACCTGAATCATGAGTGCCATCGCAAGCATCCTCTTGCTCTACAA  
TTAATAGCAAACGGCTCTCTTGCAAGATATGCAGAGAAACCAATCGAAAAACAGATCGCAGGCGTATAGGATTTGTTTATGGTTGTTACCCTGTAAGTTTGCT  
GTTACATTGAATGTGTATCAGCATCTTTAGATCTTGTGTTGAAGATAAAAGCCATGAACATCCTCTCAGTTTGTTTACAAGGAGATCATCATTCAATTGTGATG  
CATGTGGTATGGAAGGAAGTTATGCTTCCTACATATGTTGTACATGCAACATTATGGTTCATAAAAAGTGCACTTCATTGCCGCGCATCATCAAAAGCAAGTGGC  
ATGATCATCGCCTTTTTCACATATATTTCTTTCCGGATGAATTTACAAGTTCAGACTGCATGATTTGTCATGATGAAGTCGATCCAGAGCATGGTAGTTATTGCTGT  
TCACATTGCAATATTACATTCCATGTGCGTTGTGTGACAGAGGATAAACGCTCATATTCAATAGTTTCACTAGAAAATGAAGATGAGATGCCCAATGAAAGTTCC  
ATCATTGTTATTGAGAGCAACGATGCTGGAGAAGCTACAAAATAAAGCATTTCAGCATAATGCATAATCTAATGTTAGGTCCCTTTGATGGAGGATACGAAAAT  
AATTGCGACGGGTGTATGTTGCCAATCTCGGATCCATTTACTACTGTTTCCAGAAATGTGTTTTTTTTCTTCATAAAGCGTGTGCCGAGTTACCTAAGATGAAGAATG  
TTTGGCATGAGTTGTGCCGAGAACCTCTTGCCCTTATTCAGACAAAGTTTTTGTAGTGTGCGAAATGTCCGGCACATATCTAATACCTTTGCTTATGAATGTAGTG  
AATGTGAGAGTAAGAGATGTCTCAGATGTGTGATTGTGCTTACCCCTGGTGCTCGAACATCTTTGAGACATGAGCACCCCTCTTTTTCTACAAAGATTACCATG  
GGCGCTGTGATGCTTGTGGTAATCTTACATTGGGAGCATTTTGTTGTAAGGATTGCAATTTGTGCTACATTTGGATGTTTTTCACTTCCAATTACAGCTCATCAC  
AAATGTGATGAGCATCTTCTTCACTCACTGCTCATAATGATAACAAATATTTAGAAAGTCATTTATTGCGATATTTGTGAAGAAAATCGAGATACAAATCGTTGGT  
TTTATCATTGTGCAATATGCGATACTTCTGTTTCAATGTTAATTGTGTTCTTGGAAAATATCCATTCTCAAACCTGGGAGCATATTTGAAGAAACAGATCATCCACAC  
CCACTCACTATCGTGAAGAAGAAGTATTACTACCTTGATTGTAATAAATGCGGTAAGCCTTGTGAAGATTATCTCTTGGAGTGTCAAAGTTGGAGTGTAATATA  
TTGTCCACTTGGATTGTGTAGTACACTACACTCTACGGTGTTTTTTGTGGTGGCGCATGTAACAATTGAGATGTAATCATATTTGAAACCTATCACTTCATTGTG  
GGAAAATAAAGAGTGGAGAACAGGGTTGATCTTTGTCTTGTGCTTGTGATGTTAGTGTGTCATTGTAATTTGGTTTTTTGACCTTTAAGTTTAAAGAA  
ATGTCATGTAATAATCTTAAGTTGAAACTTGTGTGATTTGCATTGATGTGTGATTGTTGATTTAGAATTTCTTGAATATGGGAGTGTGGTTGTACCTACAACAAT  
AAAGGTGTTGCTGGATGCTTCTCTTTGTTTCTTTATATAAGTTTTCTTG

**Yellow letters: cleavage cite**

**B: Deduced amino acids (677 aa) and domains of GhCHR**

MEESNNYGHQHPLLLILNQDQLIHNQSGVT**HCSRCGEKVSAPCFCCAERCGFYVHKVCAEAPLELNHPFHTHHPLLLMQNAPYSSGRYICNFCD**KDGSKFV  
YHCSGCLDFHIKCALFTFNAENNLKELDHVALQHPLISTENGDEELGDVSKCFGCWEPLAKYTHFSPDCGFNFHEKCAKLPFKLNHECHRKHPLALQFNSK  
RL**SCKICRETNRKTD**RRRIGFVYGCSPCKFAVHIECVSASLDLVVEDKSHEHPLSLFTRRSSFICD**ACG**MEGSYASYICCTCNIMVHKKCTSLPRIKSKWHDH  
RLFHIYFFPDEFTSSDCMICHDEVDPEHGSYCCSHCNITFHVRCVTEDKRSYSIVSLENEDEMPNESSIIVIESNDAGEATKIKHFKHM**HNLMLGPFDDGGYENN**  
**CDGCMLPISDPFYCSECVFLLHKACAELPKMKNVWHEL**C**REPLALISDKVF**ECAKCRHISNTFAYECSECESKRCLRCVIVLTPGARTSLR**HEHPLFFYKDY**  
**HGRCDACGNLTLGAFCKDCNFVLHFGCFSLPITAHK**CDEHLLSLTAHNDNKYLESH**YCDICEESRD**TNRWFYHCAICDTSVHVNCVVLGKYPFLKLSIFE  
**ETDHPHPLTIVKKKYYLDCNKCG**KPCEDLSLECSKLECKYIVHLDCVVHYTLRCFLWWRM

PHD-type zinc finger domain

CI domain

**C: Comparison of amino acid sequence alignments between GhCHR and other species PHD (a), and GhCHR and other PHD-type finger proteins (b)**

(a)

PHD-1(GhCHR) ----HCSRGGEEKUSAP-----CFCCAER-----CGFYVHKUCAEAP--LELNHPFHTHHPLLLMQNAPYSSGRYI--CNFCD  
 PHD-2(GhCHR) ----SKKICRETNRKTRRRIGFUYGCS-----PCKFAUHIEGUS-----ASLDLUVEDKSHEHPLSLFTRRSSFI--CDACG  
 PHD-3(GhCHR) ----YCDICEES-RDTNR----WFYHCA-----ICDTSUHUNCULGKYPFLKLSIFEETDHPHPLTIUKKKYYVLDCKKCG  
 OsUIL1 CKRCSGCICHLFDDNKDP---SLWLUCSSE-TGDRDCSESSCHIECALQH---QKUGCVDLGQSIQ-----LDGNYC-CAACGK  
 OsUIL2 CRRCSGCICFKYDDNKDP---SLWLFCSDDQLQKDSGVFSCHECALKD---GRTGIMQSGQCKK-----LDGGYV-CTRCK  
 OsUIL3 CKRCSGCICHQFDDNKDP---SLWLUCASE-NDDKNCGSSSCHIECALQH---KRUGCFNLGNIQ-----LDGSYS-CASCGK  
 OsUIL4 CKRCSGCICHKYDENKDP---SLWLUCSSDTPYSGYSGTSCHLKCALKN---KKAGIFKNGCNKK-----SDGSFY-CUVGCK  
 AtUIL1 CKRCSGCUCNFDENKDP---SLWLUCPEKSDVEFGLSCHIECAFRE---UKUGVIALGNLMK-----LDGFCF-CYSGCK  
 AtUIL2 CRRCSGCICRKYDDNKDP---SLWLTGSSDPPFEGESGFSCHLECAFNT---EKSLGKDKQSE-----GCCFY-CUSCGK  
 AtUIL3 CKRCSGCICFKYDDNKDP---SLWLTGNSDSQFDGESGSLCHLNCAFDS---EKSLKEDTPSSD-----IDGCFN-CUSCGK  
 TmUIL1 CKRCSGCICHLFDDNKDP---SLWLUCSSE-TGDTDCSESSCHVECALQR---RKAGRIDLGQSMH-----LDGNYC-CAACGK  
 TmUIL2 CRRCSGCICFKYDDNKDP---TIWLSGSSDHPMKDSGSLCHLECALKD---GRTGILPSGQCKK-----LDGAYY-CPNCRK  
 TmUIL3 CKRCSGCICHQFDDNKDP---SLWLUCASE-NDDKQCGSSSCHIECALQ---KRUGCFDLQKIIH-----LDGSYS-CASCGK  
 KAP1 ---TICRUCQKPGD-----LVMCN-----QCEFCFHLDCPLP-----ALQDVP-----GEEWS-CSLCHU  
 MSTF ---ARCKUCRKKGEDDK-----LILCD-----ECNKAFHLFCPLP-----ALVEUP-----DGEWQ-CPACQP  
 Pygopus ---YPCGMCHKEUNDNE-----AVEGES-----GGMFFHRTCVGLT-----EAAFQMLNKEUF-----AEMC-CDKCVS  
 Cys4-His-Cys3 \* \* \* \* \* : \* \*  
 C C C C H C C C

(b)

C1-1(GhCHR) HNLMLGPFDDGGYENNCGGMLPIS---DPF-----YYCSECUFFLHKACAELPKM----KNUWHEL C  
 C1-2(GhCHR) -HEHPLFFYKDYHGRCDACGNLT-----LGA-----FCKKDCNFULHFGCFSLPITAH-HKC  
 RaF1 HNFARKTFL--KLAFCDICQKFL-----LNG-----FRQQTGGYKFHEHCSTKVPT----MC  
 DGK1 URWTEGADQTDDSSFCSYCDESCSSSFLGGS---PIWCLWCQRLVHVDGHSNMSNETGDIC  
 DGKD HQWLEGNLP--USAKCTUCDKTCGSULRLQD-----WRCLWCKAMUHTSCKESLLT----KC  
 DGKQ HHWREGNLP--SGARCEUCRKTGSSDULAG-----URCEWCGUQAHSLSAALAP-----EC  
 DAGK5 HHWIRGNUP--LCSYCMUCKQCGCQPKLCD-----YRCIWCQKTUHDCEMKNLKNE--KC  
 CIT HRFNUGLNM--RATKCAUCLDTUHFGRQAS-----KCLECQUMCHPKCSTCLPA----TC  
 rdgA HYWKPTSAS---GDLCCLEECIK---SGQR-----MKCSACQLVAHHNCIPFUNEKSTLAC  
 Dgkz HHWUHHRRQ---DGKCRHCCKGFGQKFTFHSKEIUAISCSWCKQAYHSHKCSCFMLQIEEPC  
 KPC1 HRFIPFSNL--TANWCCHCGYMLPIGSKKNS-----RKCSECALTAHAQCQVHLVPD----FC  
 OSJNBb0024A20-2 -----GWDLGCGPIQ-PGRLU-----YRCAECAFVHPLCT  
 \* \* \* \* \*  
 C C C C H C

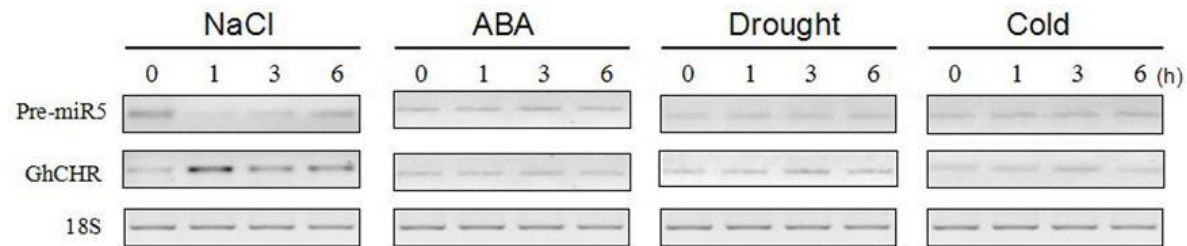

**Supplementary Data S3.** Effects of salinity, ABA, drought and cold stresses on expression of pre-miRNVL5 and *GhCHR* in seedlings of cotton (*Gossypium hirsutum*) plants. Two week-old cotton seedlings were treated with NaCl (0-400 mM) (A), ABA (100  $\mu$ M), drought (20% polyethylene glycol 600) and cold (4  $^{\circ}$ C) for 0, 1, 3 and 6 h. After that, total RNA was extracted and analyzed by semi-quantitative RT-PCR.

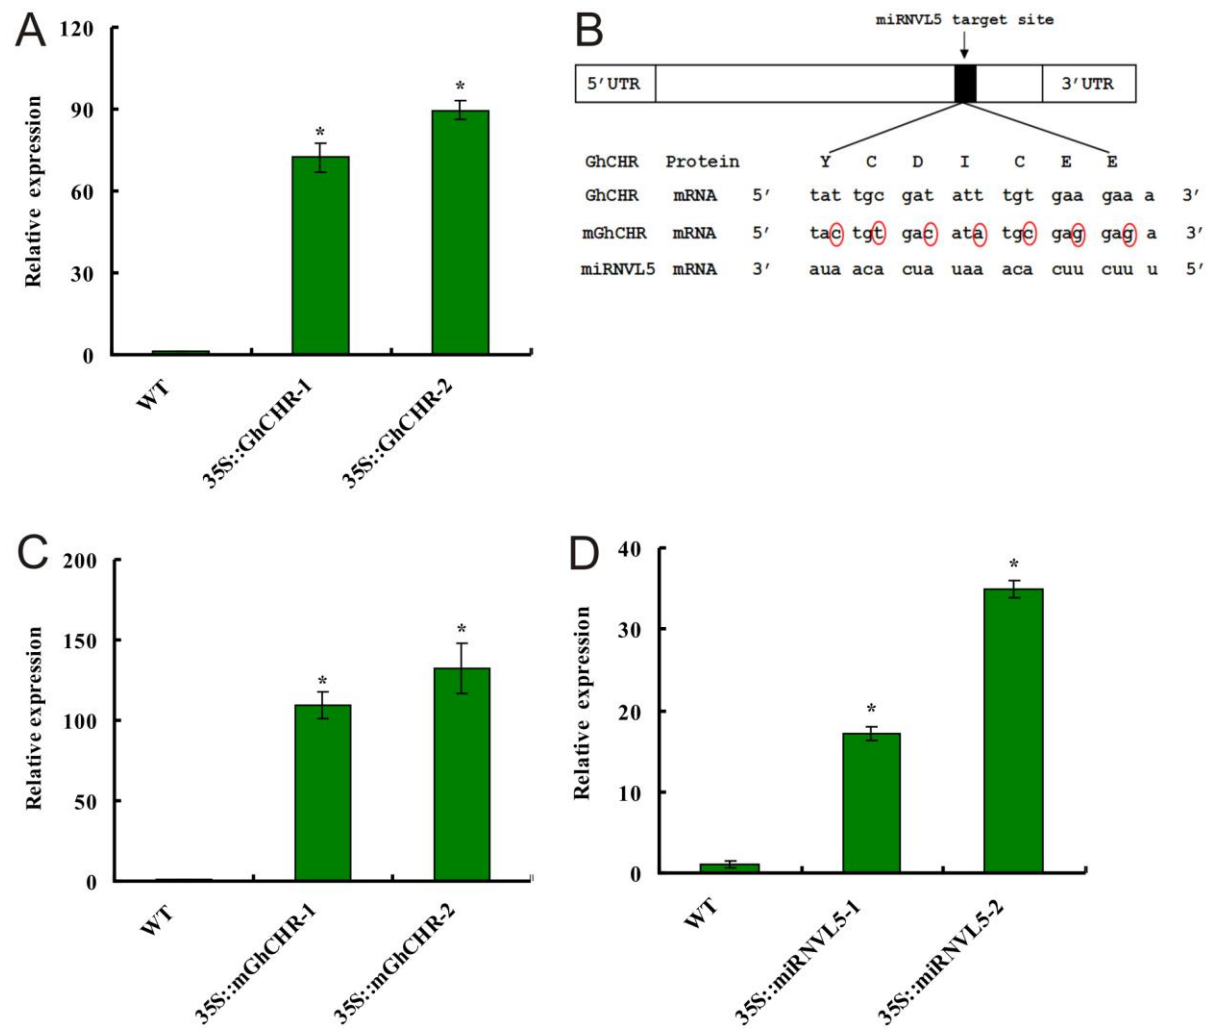

**Supplementary Data S4.** Expression of *GhCHR* and miRNVL5 in transgenic Arabidopsis and wild type (WT). Transcripts in 4 week-old

seedlings were analyzed using qRT-PCR. Values are the means  $\pm$  standard deviation (SD). Means followed by different letters are significantly different at  $p < 0.05$ . A: qRT-PCR analysis of *GhCHR* mRNA in transgenic lines overexpressing *GhCHR* (*35S::GhCHR*). B: Base pairing of miRNVL5 with its corresponding complementary site of *GhCHR* and miRNVL5-resistant form of *mGhCHR*. C: qRT-PCR analysis of *GhCHR* mRNA in transgenic lines overexpressing miRNVL5-resistant form (*35S::mGhCHR*). D: qRT-PCR analysis of miRNVL5 in *35S::miRNVL5* Arabidopsis lines.



## Supplementary Data S5 Differential expression of genes in WT and miRNVL5 under salt stress

| AGI ID    | Description                                                                        | WT+S/WT (Up) | miR5+S/WT (Up) | miR5+S/WT+S (Down) |
|-----------|------------------------------------------------------------------------------------|--------------|----------------|--------------------|
| AT1G02460 | Pectin lyase-like protein                                                          | 3.8511736    | 3.8511736      | 1                  |
| PP2CA     | protein phosphatase 2C 37                                                          | 9.376997     | 9.376997       | 1                  |
| COL1      | zinc finger protein CONSTANS-LIKE 1                                                | 2.462924     | 2.462924       | 1                  |
| 42097     | 5'-adenylsulfate reductase 3                                                       | 2.8906884    | 2.8906884      | 1                  |
| AT2G26610 | Transducin family protein / WD-40 repeat family protein                            | 12.228756    | 12.225176      | 1.0002929          |
| AT4G19200 | proline-rich family protein                                                        | 2.4270766    | 2.4259715      | 1.0004555          |
| CCA1      | protein CCA1                                                                       | 2.565155     | 2.563953       | 1.0004687          |
| AT1G75000 | GNS1/SUR4 membrane-like protein                                                    | 2.718698     | 2.7173057      | 1.0005125          |
| NAC053    | NAC domain containing protein 53                                                   | 2.3932486    | 2.3912387      | 1.0008405          |
| AT4G26580 | RING/U-box domain-containing protein                                               | 2.0456853    | 2.0437539      | 1.0009451          |
| ABF1      | abscisic acid-insensitive 5-like protein 4                                         | 3.1246445    | 3.121655       | 1.0009576          |
| AT1G29640 | hypothetical protein                                                               | 3.9133673    | 3.9087703      | 1.001176           |
| PIP2B     | aquaporin PIP2-2                                                                   | 2.538842     | 2.5351675      | 1.0014493          |
| AT5G18340 | U-box domain-containing protein 48                                                 | 2.4465628    | 2.442946       | 1.0014805          |
| AT4G01280 | myb family transcription factor                                                    | 2.525326     | 2.5215228      | 1.0015084          |
| AT2G42270 | U5 small nuclear ribonucleoprotein helicase                                        | 2.3193634    | 2.3152368      | 1.0017824          |
| AT5G08139 | RING/U-box domain-containing protein                                               | 2.0949938    | 2.090961       | 1.0019288          |
| AT1G24580 | RING/U-box domain-containing protein                                               | 12.445006    | 12.416526      | 1.0022938          |
| AT1G73390 | Endosomal targeting BRO1-like domain-containing protein                            | 4.4853163    | 4.4744835      | 1.002421           |
| CK1       | choline kinase 1                                                                   | 2.7362354    | 2.7288456      | 1.002708           |
| EDA9      | D-3-phosphoglycerate dehydrogenase                                                 | 2.944129     | 2.9350524      | 1.0030925          |
| ENODL2    | early nodulin-like protein 2                                                       | 3.8698719    | 3.857839       | 1.003119           |
| PPCK1     | phosphoenolpyruvate carboxylase kinase 1                                           | 2.0093555    | 2.0029452      | 1.0032005          |
| AT1G60750 | auxin-induced atb2-like protein                                                    | 2.4820645    | 2.473724       | 1.0033717          |
| AT4G29770 | hypothetical protein                                                               | 2.087976     | 2.0809488      | 1.003377           |
| AT4G33550 | bifunctional inhibitor/lipid-transfer protein/seed storage 2S albumin-like protein | 2.221798     | 2.21298        | 1.0039847          |

|           |                                                                 |           |           |           |
|-----------|-----------------------------------------------------------------|-----------|-----------|-----------|
| AT1G53210 | calcium-binding EF-hand domain-containing protein               | 2.1517618 | 2.143158  | 1.0040146 |
| MPK19     | mitogen-activated protein kinase 19                             | 3.1702876 | 3.156023  | 1.0045198 |
| AT3G04000 | 3-oxoacyl-[acyl-carrier protein] reductase                      | 3.0724297 | 3.0579948 | 1.0047203 |
| AT3G48990 | AMP-dependent synthetase and ligase-like protein                | 2.0772448 | 2.0674515 | 1.0047369 |
| AT2G13960 | myb family transcription factor                                 | 9.235979  | 9.191244  | 1.0048671 |
| AT4G19200 | proline-rich family protein                                     | 2.1638145 | 2.1531277 | 1.0049634 |
| AT5G18636 | hypothetical protein                                            | 2.7230318 | 2.7093375 | 1.0050545 |
| tic20-IV  | translocon at the inner envelope membrane of chloroplasts 20-IV | 2.1836915 | 2.1717591 | 1.0054944 |
| AT5G17760 | AAA-type ATPase family protein                                  | 2.7458513 | 2.730809  | 1.0055083 |
| AT3G09440 | protein heat shock protein 70-3                                 | 2.0231476 | 2.0119846 | 1.0055482 |
| NAC053    | NAC domain containing protein 53                                | 2.3470216 | 2.3337862 | 1.0056711 |
| AT5G59490 | haloacid dehalogenase-like hydrolase domain-containing protein  | 3.3904226 | 3.3711092 | 1.0057291 |
| ATGLR1.2  | glutamate receptor 1.2                                          | 2.3588674 | 2.3444586 | 1.006146  |
| UPL5      | E3 ubiquitin-protein ligase UPL5                                | 2.1834302 | 2.168924  | 1.0066881 |
| AT5G02020 | hypothetical protein                                            | 11.525537 | 11.445476 | 1.006995  |
| AT1G71110 | hypothetical protein                                            | 2.0834332 | 2.0675335 | 1.0076902 |
| PP2CA     | protein phosphatase 2C 37                                       | 7.3281417 | 7.2702947 | 1.0079566 |
| DHAR2     | glutathione S-transferase DHAR2                                 | 2.4653754 | 2.4451206 | 1.0082839 |
| AT1G30080 | glycosyl hydrolases family 17 domain-containing protein         | 2.5611393 | 2.5400572 | 1.0082998 |
| AT3G59350 | protein kinase family protein                                   | 2.2995615 | 2.2803025 | 1.0084459 |
| AT3G62260 | putative protein phosphatase 2C 49                              | 4.2880135 | 4.2510805 | 1.0086879 |
| DAR6      | protein DA1-related 6                                           | 2.2634008 | 2.2436376 | 1.0088085 |
| AT1G02820 | late embryogenesis abundant 3-like protein                      | 2.1471086 | 2.1279118 | 1.0090213 |
| RD19      | cysteine proteinase RD19a                                       | 2.0283031 | 2.0101342 | 1.0090387 |
| AT3G57540 | Remorin family protein                                          | 7.1788316 | 7.1140885 | 1.0091007 |
| AT2G35990 | cytokinin riboside 5'-monophosphate phosphoribohydrolase LOG2   | 2.5287726 | 2.505227  | 1.0093986 |
| AT1G59860 | HSP20-like chaperone                                            | 3.7089167 | 3.6736968 | 1.009587  |
| AT3G25870 | hypothetical protein                                            | 2.93942   | 2.9114687 | 1.0096004 |
| VAMP725   | vesicle-associated membrane protein 725                         | 2.133735  | 2.1132956 | 1.0096718 |

|           |                                                    |           |           |           |
|-----------|----------------------------------------------------|-----------|-----------|-----------|
| AT1G22985 | ethylene-responsive transcription factor ERF069    | 2.787973  | 2.7606752 | 1.009888  |
| SHM7      | serine hydroxymethyltransferase 7                  | 3.0827909 | 3.0515614 | 1.010234  |
| AT4G35720 | hypothetical protein                               | 2.086973  | 2.0638304 | 1.0112134 |
| ATSAC1B   | Phosphoinositide phosphatase-like protein          | 7.908695  | 7.816103  | 1.0118463 |
| NAM       | NAC domain-containing protein 18                   | 2.25321   | 2.2268207 | 1.0118507 |
| ADR1-L1   | putative disease resistance protein ADR1-like 1    | 2.4015775 | 2.3734019 | 1.0118715 |
| CRK15     | cysteine-rich receptor-like protein kinase 15      | 2.1189244 | 2.0931818 | 1.0122982 |
| MSS1      | sugar transport protein 13                         | 2.305659  | 2.277624  | 1.012309  |
| AT2G39350 | ABC transporter G family member 1                  | 2.7211144 | 2.687994  | 1.0123217 |
| AT4G31196 | oxidoreductase                                     | 2.030236  | 2.0051348 | 1.0125184 |
| AT2G38410 | VHS and GAT domain-containing protein              | 2.4555843 | 2.4244428 | 1.0128448 |
| EDA12     | embryo sac development arrest 12 protein           | 7.1828237 | 7.0903234 | 1.013046  |
| PIF7      | transcription factor PIF7                          | 2.2016892 | 2.1721625 | 1.0135932 |
| BCB       | blue copper protein                                | 2.5548491 | 2.5201647 | 1.0137627 |
| RHA2B     | putative E3 ubiquitin-protein ligase RHA2B         | 2.2795956 | 2.2479763 | 1.0140657 |
| RLP53     | receptor like protein 53                           | 7.283559  | 7.1805067 | 1.0143516 |
| SAG13     | senescence-associated protein 13                   | 2.3223643 | 2.2894979 | 1.0143553 |
| UGT76E11  | UDP-glucosyl transferase 76E11                     | 5.1533446 | 5.0795536 | 1.014527  |
| AT1G10585 | basic helix-loop-helix domain-containing protein   | 3.3822453 | 3.3334074 | 1.0146511 |
| AT3G19240 | Vacuolar import/degradation, Vid27-related protein | 3.3131528 | 3.2649066 | 1.0147772 |
| HAT22     | homeobox-leucine zipper protein HAT22              | 2.389207  | 2.354345  | 1.0148073 |
| AT2G38340 | dehydration-responsive element-binding protein 2E  | 3.9656396 | 3.9065282 | 1.0151315 |
| UGT73B5   | UDP-glucosyl transferase 73B5                      | 2.1340735 | 2.1016448 | 1.0154301 |
| CK1       | choline kinase 1                                   | 2.6714456 | 2.630302  | 1.0156422 |
| AT4G38060 | hypothetical protein                               | 2.4016402 | 2.3627048 | 1.0164791 |
| ZF2       | zinc-finger protein 2                              | 2.64291   | 2.5994618 | 1.0167143 |
| AT3G24420 | hydrolase, alpha/beta fold family protein          | 2.436751  | 2.396174  | 1.0169342 |
| PUB18     | U-box domain-containing protein 18                 | 2.3034623 | 2.2643697 | 1.0172642 |
| AT1G27200 | hypothetical protein                               | 2.1434767 | 2.1067092 | 1.0174525 |

|           |                                                                       |           |           |           |
|-----------|-----------------------------------------------------------------------|-----------|-----------|-----------|
| AT2G32050 | hypothetical protein                                                  | 2.2732198 | 2.2334871 | 1.0177895 |
| AT1G51440 | phospholipase A1-Igamma3                                              | 3.06474   | 3.01049   | 1.0180203 |
| NF-YC3    | nuclear transcription factor Y subunit C-3                            | 2.1136992 | 2.075388  | 1.0184599 |
| AT3G11420 | hypothetical protein                                                  | 4.1061177 | 4.0280066 | 1.019392  |
| ATAF1     | NAC domain-containing protein 2                                       | 7.803936  | 7.6455226 | 1.0207198 |
| AFP3      | Ninja-family protein AFP3                                             | 7.935931  | 7.774674  | 1.0207413 |
| EDL3      | EID1-like F-box protein 3                                             | 19.152058 | 18.751087 | 1.0213839 |
| AT1G07400 | class I heat shock protein                                            | 4.0619917 | 3.9766335 | 1.021465  |
| WIN2      | putative protein phosphatase 2C 59                                    | 2.1175857 | 2.072628  | 1.0216911 |
| AT4G11570 | haloacid dehalogenase-like hydrolase domain-containing protein        | 2.1456683 | 2.0999494 | 1.0217716 |
| EXLA3     | expansin-like A3                                                      | 2.2884552 | 2.2396479 | 1.0217924 |
| AT1G54050 | HSP20-like chaperone                                                  | 3.875778  | 3.7923393 | 1.0220019 |
| AT4G10510 | Subtilase family protein                                              | 2.2687035 | 2.217894  | 1.0229089 |
| RAP2.10   | ethylene-responsive transcription factor RAP2-10                      | 3.0793612 | 3.0101774 | 1.0229833 |
| AT5G05220 | hypothetical protein                                                  | 4.3875866 | 4.2886567 | 1.0230678 |
| AT1G01500 | Erythronate-4-phosphate dehydrogenase-like protein                    | 2.3210428 | 2.2678173 | 1.0234699 |
| AT1G07500 | hypothetical protein                                                  | 3.0693867 | 2.9987595 | 1.0235522 |
| UGT73B2   | UDP-glucosyltransferase 73B2                                          | 4.6087947 | 4.5008173 | 1.0239906 |
| AT1G47980 | hypothetical protein                                                  | 2.8899672 | 2.8211362 | 1.0243982 |
| HSP18.2   | heat shock protein 18.2                                               | 4.087278  | 3.9885936 | 1.0247416 |
| ATMS1     | 5-methyltetrahydropteroyltriglutamate--homocysteine methyltransferase | 2.1730587 | 2.1205006 | 1.0247856 |
| AT4G27560 | UDP-glycosyltransferase-like protein                                  | 2.9700515 | 2.8962984 | 1.0254647 |
| MYB96     | myb domain protein 96                                                 | 3.9733384 | 3.872034  | 1.0261631 |
| AT3G28600 | AAA-type ATPase family protein                                        | 9.98129   | 9.7150345 | 1.0274066 |
| ARSK1     | root-specific kinase 1                                                | 2.7108495 | 2.638081  | 1.0275838 |
| AT4G20320 | putative CTP synthase                                                 | 5.2255983 | 5.0851007 | 1.0276294 |
| AT2G44970 | alpha/beta-hydrolase domain-containing protein                        | 2.2804449 | 2.2186573 | 1.0278491 |
| RLP7      | receptor like protein 7                                               | 2.444479  | 2.378092  | 1.0279161 |
| AT4G20880 | ethylene-responsive/regulated nuclear protein                         | 2.1235487 | 2.0651104 | 1.028298  |

|           |                                                            |           |           |           |
|-----------|------------------------------------------------------------|-----------|-----------|-----------|
| AT1G17745 | D-3-phosphoglycerate dehydrogenase                         | 2.1295612 | 2.0708272 | 1.0283625 |
| TIP2;2    | putative aquaporin TIP2-2                                  | 3.8160532 | 3.7107217 | 1.0283856 |
| AT5G59760 | hypothetical protein                                       | 4.4959984 | 4.3718934 | 1.0283871 |
| AT1G52560 | HSP20-like chaperone                                       | 3.9490964 | 3.8399632 | 1.0284203 |
| AT5G52660 | myb family transcription factor                            | 3.3128285 | 3.2210765 | 1.028485  |
| LEA       | dehydrin LEA                                               | 5.4011555 | 5.251152  | 1.0285659 |
| AT3G11580 | AP2/B3 domain-containing protein                           | 2.4127853 | 2.3455932 | 1.0286461 |
| AT2G17500 | auxin efflux carrier-like protein                          | 3.1851935 | 3.0961902 | 1.028746  |
| MYB34     | myb domain protein 34                                      | 2.3322704 | 2.2660527 | 1.0292215 |
| UBQ10     | polyubiquitin 10                                           | 2.786512  | 2.706367  | 1.0296135 |
| PGP11     | P-glycoprotein 11                                          | 3.0322697 | 2.9405646 | 1.0311862 |
| ACHT4     | thioredoxin-like 1-1                                       | 2.567963  | 2.490058  | 1.0312864 |
| AP4.3A    | putative protein kinase                                    | 2.085008  | 2.0217278 | 1.0313001 |
| ZF14      | MATE efflux family protein                                 | 3.392985  | 3.289575  | 1.0314357 |
| NAC004    | NAC domain-containing protein 4                            | 3.138707  | 3.0428414 | 1.0315052 |
| AT4G30730 | hypothetical protein                                       | 3.4569237 | 3.3512847 | 1.0315219 |
| AT2G02870 | F-box/kelch-repeat protein SKIP11                          | 2.485128  | 2.408779  | 1.0316962 |
| AT5G02950 | PWWP domain-containing protein                             | 2.3923345 | 2.3181143 | 1.0320175 |
| ERD14     | dehydrin ERD14                                             | 3.0535753 | 2.9585083 | 1.0321335 |
| LEA4-5    | late embryogenesis abundant protein 4-5                    | 70.16928  | 67.976746 | 1.0322542 |
| AT3G52310 | ABC transporter G family member 27                         | 4.669054  | 4.5207534 | 1.0328044 |
| AT3G24090 | putative glucosamine-fructose-6-phosphate aminotransferase | 2.6950414 | 2.6086745 | 1.0331075 |
| MTHSC70-2 | mitochondrial HSO70 2                                      | 2.273379  | 2.199183  | 1.033738  |
| RXW8      | lipase/hydrolase                                           | 4.537028  | 4.3880157 | 1.0339588 |
| 42095     | 5'-adenylylsulfate reductase 1                             | 2.3134131 | 2.2371266 | 1.0341003 |
| AT3G54410 | hypothetical protein                                       | 3.028638  | 2.9286673 | 1.0341351 |
| AT1G69360 | hypothetical protein                                       | 2.4258575 | 2.3456955 | 1.0341741 |
| DAD1      | putative phospholipase A1                                  | 40.62535  | 39.259502 | 1.0347903 |
| AT2G45820 | Remorin                                                    | 2.2337618 | 2.1562598 | 1.0359428 |

|           |                                                                |           |           |           |
|-----------|----------------------------------------------------------------|-----------|-----------|-----------|
| SHM7      | serine hydroxymethyltransferase 7                              | 2.9380777 | 2.8361108 | 1.035953  |
| AT5G15660 | putative F-box protein                                         | 31.801104 | 30.683235 | 1.0364325 |
| DREB1A    | dehydration-responsive element-binding protein 1A              | 20.748535 | 20.01548  | 1.0366244 |
| AT3G61390 | U-box domain-containing protein 36                             | 2.822859  | 2.7223542 | 1.0369184 |
| ERD14     | dehydrin ERD14                                                 | 2.9464467 | 2.8405256 | 1.0372893 |
| AZG1      | adenine/guanine permease AZG1                                  | 2.1107266 | 2.0344384 | 1.0374985 |
| AT1G51820 | putative LRR receptor-like serine/threonine-protein kinase     | 2.153038  | 2.0751793 | 1.037519  |
| ERD10     | dehydrin ERD10                                                 | 7.434529  | 7.161176  | 1.0381714 |
| TPD1      | tapetum determinant 1                                          | 2.1945825 | 2.11272   | 1.0387474 |
| AT4G22758 | hypothetical protein                                           | 3.7654164 | 3.6248004 | 1.0387927 |
| RAP2.4    | ethylene-responsive transcription factor RAP2-4                | 2.290185  | 2.2045991 | 1.0388216 |
| ZFHD1     | zinc finger homeodomain 1                                      | 5.742815  | 5.527686  | 1.0389184 |
| PDE149    | TerC integral membrane domain-containing protein               | 2.206762  | 2.1238978 | 1.0390152 |
| AT1G76600 | hypothetical protein                                           | 2.5434597 | 2.4468005 | 1.0395044 |
| AT4G39130 | Dehydrin family protein                                        | 2.8365617 | 2.7270586 | 1.0401542 |
| ERD14     | dehydrin ERD14                                                 | 2.794719  | 2.6866918 | 1.0402082 |
| NAC019    | NAC domain-containing protein 19                               | 18.601969 | 17.882786 | 1.0402164 |
| AT4G38060 | hypothetical protein                                           | 3.2814481 | 3.1544776 | 1.0402509 |
| TRANS11   | phospho-N-acetylmuramoyl-pentapeptide-transferase-like protein | 2.9707701 | 2.8545206 | 1.0407248 |
| AT2G25625 | hypothetical protein                                           | 3.4894059 | 3.3510377 | 1.0412911 |
| SVL4      | protein SEUSS-like 4                                           | 9.069902  | 8.709818  | 1.0413424 |
| AT3G54390 | sequence-specific DNA binding transcription factor             | 2.3508694 | 2.2574918 | 1.0413634 |
| AT5G42570 | B-cell receptor-associated 31-like protein                     | 2.5386002 | 2.4376693 | 1.0414047 |
| DOF1      | Dof zinc finger protein DOF1.7                                 | 2.5306518 | 2.4293928 | 1.0416808 |
| AT1G66510 | A1 cistron-splicing factor AAR2                                | 2.4360616 | 2.3384948 | 1.041722  |
| AT2G25625 | hypothetical protein                                           | 3.126975  | 3.0007167 | 1.0420761 |
| AT4G12430 | haloacid dehalogenase-like hydrolase domain-containing protein | 3.6481054 | 3.498471  | 1.0427713 |
| AT3G17770 | Dihydroxyacetone kinase                                        | 2.557847  | 2.451113  | 1.0435451 |
| AT2G39050 | hydroxyproline-rich glycoprotein-like protein                  | 2.6351573 | 2.524984  | 1.0436333 |

|           |                                                      |           |           |           |
|-----------|------------------------------------------------------|-----------|-----------|-----------|
| MYB7      | myb domain protein 7                                 | 2.6653318 | 2.5530968 | 1.0439605 |
| NAC096    | NAC domain containing protein 96                     | 2.2527797 | 2.157145  | 1.0443338 |
| GID1B     | putative gibberellin receptor GID1L2                 | 2.5090659 | 2.402426  | 1.0443884 |
| AT1G03070 | transmembrane BAX inhibitor motif-containing protein | 4.3146095 | 4.1302834 | 1.044628  |
| FLS6      | flavonol synthase 6                                  | 9.640937  | 9.228193  | 1.0447264 |
| AT1G30740 | FAD-binding and BBE domain-containing protein        | 2.2573636 | 2.1606066 | 1.0447823 |
| AGO2      | Argonaute family protein                             | 2.8815155 | 2.7564082 | 1.0453879 |
| AT5G51845 | putative defensin-like protein 270                   | 4.399197  | 4.206629  | 1.0457773 |
| AT2G43500 | RWP-RK domain-containing protein                     | 2.5931306 | 2.4795654 | 1.0458004 |
| AT4G27560 | UDP-glycosyltransferase-like protein                 | 2.5244465 | 2.4135478 | 1.0459484 |
| CER1      | CER1 protein                                         | 11.520266 | 11.011364 | 1.046216  |
| MYB49     | myb domain protein 49                                | 4.884303  | 4.6664867 | 1.0466768 |
| SRC2      | hypothetical protein                                 | 2.7642708 | 2.6404443 | 1.0468961 |
| AT1G05870 | hypothetical protein                                 | 2.7281206 | 2.6048303 | 1.0473315 |
| AT2G11891 | hypothetical protein                                 | 2.1433945 | 2.0463588 | 1.0474187 |
| SQE3      | squalene epoxidase 3                                 | 2.4253316 | 2.3154004 | 1.0474782 |
| AER       | 2-alkenal reductase                                  | 3.6252341 | 3.4606345 | 1.0475634 |
| UGT71B1   | UDP-glucosyl transferase 71B1                        | 2.3226805 | 2.2160804 | 1.048103  |
| SULTR1;2  | sulfate transporter 1.2                              | 2.5374677 | 2.4203074 | 1.0484072 |
| HSC70-1   | heat shock 70kDa protein 1/8                         | 2.6663823 | 2.542868  | 1.0485729 |
| AT1G04770 | male sterility MS5 family protein                    | 2.356081  | 2.246075  | 1.048977  |
| IDD16     | ribonuclease P subunit RPR2                          | 2.1817899 | 2.0798197 | 1.0490284 |
| MSL4      | mechanosensitive channel of small conductance-like 4 | 5.788264  | 5.5171256 | 1.0491449 |
| AT1G64890 | integral membrane transporter family protein         | 2.601712  | 2.4792342 | 1.0494015 |
| CYP707A4  | abscisic acid 8'-hydroxylase 4                       | 2.132547  | 2.0312784 | 1.0498545 |
| RPS6      | TIR-NBS-LRR class disease resistance protein         | 2.1023562 | 2.0016375 | 1.0503182 |
| HB6       | homeobox-leucine zipper protein ATHB-6               | 2.7082658 | 2.578129  | 1.0504773 |
| MPK7      | mitogen-activated protein kinase 7                   | 2.1140723 | 2.0122347 | 1.0506092 |
| AT5G62570 | calmodulin binding protein-like protein              | 2.5676963 | 2.4438956 | 1.0506572 |

|           |                                                                      |           |           |           |
|-----------|----------------------------------------------------------------------|-----------|-----------|-----------|
| PIP1B     | aquaporin PIP1-2                                                     | 2.3180606 | 2.2059562 | 1.0508189 |
| AT1G52565 | hypothetical protein                                                 | 2.3055844 | 2.19376   | 1.0509739 |
| CSLG2     | cellulose synthase-like protein G2                                   | 3.0838733 | 2.9338973 | 1.0511184 |
| AT5G64170 | dentin sialophosphoprotein-like protein                              | 2.2130706 | 2.1051278 | 1.0512761 |
| AT2G18340 | late embryogenesis abundant domain-containing protein                | 2.1147006 | 2.0111508 | 1.0514878 |
| AT1G76980 | hypothetical protein                                                 | 2.8123887 | 2.6741426 | 1.0516974 |
| ZIF1      | zinc induced facilitator 1 protein                                   | 3.110975  | 2.9576938 | 1.0518246 |
| AT3G57380 | Glycosyltransferase family 61 protein                                | 2.409892  | 2.2910678 | 1.0518641 |
| MAPKKK18  | mitogen-activated protein kinase kinase kinase 18                    | 25.252958 | 24.005972 | 1.0519449 |
| AT1G78070 | transducin/WD-40 repeat-containing protein                           | 10.444754 | 9.928743  | 1.0519713 |
| AT2G21640 | hypothetical protein                                                 | 2.6731732 | 2.5386388 | 1.0529947 |
| AT1G23910 | Polyketide cyclase/dehydrase and lipid transport superfamily protein | 2.27979   | 2.163984  | 1.0535152 |
| UGT73B1   | UDP-glucosyl transferase 73B1                                        | 2.1177523 | 2.010077  | 1.0535678 |
| APX2      | L-ascorbate peroxidase                                               | 3.634633  | 3.446116  | 1.0547042 |
| AT4G36010 | pathogenesis-related thaumatin family protein                        | 5.419246  | 5.1367607 | 1.0549929 |
| AT4G38140 | RING-H2 finger protein ATL18                                         | 6.913354  | 6.550641  | 1.0553706 |
| PIP1A     | aquaporin PIP1-1                                                     | 2.2187233 | 2.1022868 | 1.0553856 |
| AT1G25422 | hypothetical protein                                                 | 2.987772  | 2.8304152 | 1.0555949 |
| CLPB3     | casein lytic proteinase B3                                           | 2.1982732 | 2.082     | 1.0558468 |
| KNAT4     | homeobox protein knotted-1-like 4                                    | 2.9940197 | 2.8347874 | 1.0561708 |
| AT3G17800 | hypothetical protein                                                 | 4.501618  | 4.25926   | 1.0569013 |
| SYN1      | Sister chromatid cohesion 1 protein 1                                | 3.9127076 | 3.7018232 | 1.0569677 |
| DIN2      | beta-glucosidase 30                                                  | 6.061409  | 5.7337604 | 1.0571438 |
| AT2G18150 | peroxidase 15                                                        | 2.7225018 | 2.574692  | 1.0574087 |
| AT1G80470 | F-box/RNI-like/FBD-like domain-containing protein                    | 2.8756359 | 2.7182093 | 1.0579156 |
| PAP9      | putative inactive purple acid phosphatase 9                          | 3.4527707 | 3.2636433 | 1.0579498 |
| CLPB4     | casein lytic proteinase B4                                           | 2.6313922 | 2.4866662 | 1.0582008 |
| RPS2      | disease resistance protein RPS2                                      | 3.2098176 | 3.0331578 | 1.0582429 |
| AT2G34930 | disease resistance-like protein/LRR domain-containing protein        | 2.700568  | 2.5516407 | 1.0583653 |



|           |                                                                    |           |           |           |
|-----------|--------------------------------------------------------------------|-----------|-----------|-----------|
| AT3G15534 | hypothetical protein                                               | 4.965611  | 4.6887016 | 1.0590588 |
| MYB7      | myb domain protein 7                                               | 2.4312901 | 2.2953107 | 1.0592422 |
| ECT8      | hypothetical protein                                               | 4.0277934 | 3.8013422 | 1.0595714 |
| AT5G45350 | proline-rich family protein                                        | 2.5937426 | 2.4461017 | 1.0603576 |
| TIP2;2    | putative aquaporin TIP2-2                                          | 3.3208447 | 3.131174  | 1.0605749 |
| AT2G30766 | hypothetical protein                                               | 3.0792818 | 2.902798  | 1.0607978 |
| AT3G59940 | F-box/kelch-repeat protein SKIP20                                  | 2.2889652 | 2.1575902 | 1.0608897 |
| AT5G05220 | hypothetical protein                                               | 4.0794907 | 3.844507  | 1.0611218 |
| AT3G57010 | strictosidine synthase family protein                              | 2.7464938 | 2.5874424 | 1.0614705 |
| MEE23     | FAD-binding and BBE domain-containing protein                      | 2.1637416 | 2.0374355 | 1.0619928 |
| AT1G67360 | Rubber elongation factor protein (REF)                             | 4.6976347 | 4.423023  | 1.0620868 |
| UBQ3      | polyubiquitin 3                                                    | 2.264334  | 2.1313214 | 1.0624084 |
| AT1G22510 | C3HC4-type RING finger protein                                     | 2.1807818 | 2.0501864 | 1.0636992 |
| AT1G73920 | alpha/beta-hydrolase domain-containing protein                     | 2.3202865 | 2.1811295 | 1.0638006 |
| RD21      | cysteine proteinase RD21a                                          | 2.8973975 | 2.7222426 | 1.0643421 |
| AOC2      | allene oxide cyclase 2                                             | 3.2929387 | 3.093674  | 1.0644104 |
| AT4G37900 | hypothetical protein                                               | 2.3272543 | 2.1861815 | 1.0645293 |
| AT2G33760 | pentatricopeptide repeat-containing protein                        | 5.4422894 | 5.110927  | 1.0648341 |
| EYE       | golgi complex component-related protein                            | 2.134752  | 2.0045729 | 1.064941  |
| AT1G07590 | pentatricopeptide repeat-containing protein                        | 3.039896  | 2.8531473 | 1.0654536 |
| GSTU5     | glutathione S-transferase 103-1A                                   | 2.619459  | 2.4583452 | 1.0655375 |
| AT5G19875 | hypothetical protein                                               | 4.5227294 | 4.243556  | 1.0657876 |
| LOX3      | lipoxygenase 3                                                     | 3.768945  | 3.5356529 | 1.0659827 |
| AT1G48100 | polygalacturonase                                                  | 13.797035 | 12.939905 | 1.0662392 |
| AT1G29770 | haloacid dehalogenase-like hydrolase                               | 7.267861  | 6.8153076 | 1.0664024 |
| NAC13     | NAC domain protein 13                                              | 3.9953833 | 3.7463064 | 1.066486  |
| ABF3      | abscisic acid-insensitive 5-like protein 6                         | 10.514151 | 9.854732  | 1.066914  |
| AT2G45820 | Remorin                                                            | 2.2073405 | 2.0685737 | 1.0670832 |
| TPS11     | putative alpha,alpha-trehalose-phosphate synthase [UDP-forming] 11 | 4.985386  | 4.6685877 | 1.0678574 |

|           |                                                                    |           |           |           |
|-----------|--------------------------------------------------------------------|-----------|-----------|-----------|
| ATHSP22.0 | heat shock protein 22                                              | 3.4126785 | 3.192949  | 1.0688171 |
| ATAF1     | NAC domain-containing protein 2                                    | 6.087477  | 5.69482   | 1.0689499 |
| AT5G15290 | UPF0497 membrane protein                                           | 7.7149644 | 7.2065654 | 1.0705466 |
| AT3G55880 | Alpha/beta hydrolase related protein                               | 2.7766178 | 2.591679  | 1.0713587 |
| HB-12     | homeobox-leucine zipper protein ATHB-12                            | 13.968727 | 13.026286 | 1.0723492 |
| CPuORF12  | uncharacterized protein                                            | 2.8700905 | 2.675215  | 1.0728447 |
| AT2G38010 | neutral ceramidase                                                 | 2.2595103 | 2.1058626 | 1.0729618 |
| LOX3      | lipoxygenase 3                                                     | 3.8746355 | 3.6052625 | 1.0747166 |
| BAM5      | beta-amylase 5                                                     | 2.6059222 | 2.4236841 | 1.0751905 |
| AT5G39520 | hypothetical protein                                               | 5.4412827 | 5.060069  | 1.0753376 |
| AT1G52565 | hypothetical protein                                               | 2.226828  | 2.0704837 | 1.0755111 |
| AT3G10420 | P-loop containing nucleoside triphosphate hydrolase family protein | 2.4418359 | 2.269671  | 1.0758545 |
| UGT84A3   | UDP-glycosyltransferase-like protein                               | 3.7606702 | 3.494789  | 1.0760794 |
| PIP1A     | aquaporin PIP1-1                                                   | 3.027691  | 2.8127542 | 1.0764151 |
| bZIP48    | basic leucine-zipper 48                                            | 3.1331875 | 2.9102142 | 1.0766176 |
| AT1G22190 | ethylene-responsive transcription factor ERF058                    | 2.1818144 | 2.0263586 | 1.0767169 |
| GCN2      | ABC transporter F family member 2                                  | 3.823038  | 3.5499985 | 1.0769126 |
| KIN2      | stress-induced protein KIN2                                        | 3.9331732 | 3.6516497 | 1.0770949 |
| AT1G66060 | hypothetical protein                                               | 2.6194832 | 2.431941  | 1.0771163 |
| AT4G15248 | B-box type zinc finger-containing protein                          | 3.619552  | 3.3600433 | 1.0772337 |
| AT2G23120 | Late embryogenesis abundant protein, group 6                       | 4.2996163 | 3.9904923 | 1.0774652 |
| AT4G18920 | hypothetical protein                                               | 2.256587  | 2.093631  | 1.0778341 |
| AT4G32208 | heat shock protein 70 (Hsp 70) family protein                      | 2.8377366 | 2.6323247 | 1.0780344 |
| AT1G04445 | C2H2-like zinc finger protein                                      | 9.641439  | 8.940872  | 1.0783554 |
| SULTR3;1  | sulfate transporter 3.1                                            | 2.3150775 | 2.146839  | 1.0783658 |
| CSLB06    | cellulose synthase-like protein B6                                 | 5.8481655 | 5.420438  | 1.0789102 |
| AT3G60920 | hypothetical protein                                               | 3.8684766 | 3.5839863 | 1.0793781 |
| ERD14     | dehydrin ERD14                                                     | 2.8049111 | 2.5981648 | 1.079574  |
| AT3G55880 | Alpha/beta hydrolase related protein                               | 3.1726565 | 2.9385495 | 1.0796676 |

|           |                                                                             |           |           |           |
|-----------|-----------------------------------------------------------------------------|-----------|-----------|-----------|
| AT1G60190 | U-box domain-containing protein 19                                          | 96.19778  | 89.055695 | 1.0801979 |
| AT1G69610 | hypothetical protein                                                        | 3.7890317 | 3.507356  | 1.0803101 |
| AT1G54590 | splicing factor Prp18 domain-containing protein                             | 7.586597  | 7.022058  | 1.080395  |
| AT5G35380 | Protein kinase protein with adenine nucleotide alpha hydrolases-like domain | 2.8038387 | 2.5948436 | 1.0805426 |
| AT2G21780 | hypothetical protein                                                        | 2.193757  | 2.0293975 | 1.0809894 |
| MBF1C     | multiprotein-bridging factor 1c                                             | 2.6308706 | 2.4329991 | 1.0813282 |
| PLA IIIA  | patatin-like protein 6                                                      | 2.6280684 | 2.430138  | 1.0814482 |
| AT3G15300 | VQ motif-containing protein                                                 | 2.2456489 | 2.0757844 | 1.0818315 |
| AT1G12890 | ethylene-responsive transcription factor ERF088                             | 2.5051978 | 2.315633  | 1.0818629 |
| COR27     | cold regulated protein 27                                                   | 3.7497182 | 3.4657764 | 1.0819273 |
| AT2G42150 | DNA-binding bromodomain-containing protein                                  | 5.098594  | 4.7124705 | 1.0819366 |
| AT5G02020 | hypothetical protein                                                        | 13.475785 | 12.449713 | 1.0824174 |
| AT4G18450 | ethylene-responsive transcription factor ERF091                             | 2.218155  | 2.0480103 | 1.0830779 |
| AT3G62590 | lipase class 3 family protein                                               | 2.9065497 | 2.682126  | 1.0836738 |
| SULTR1;2  | sulfate transporter 1.2                                                     | 3.5805254 | 3.303942  | 1.0837132 |
| LTI30     | dehydrin Xero 2                                                             | 6.7289324 | 6.208312  | 1.0838586 |
| HB-7      | homeobox-leucine zipper protein ATHB-7                                      | 10.941657 | 10.094676 | 1.0839038 |
| AT3G27809 | hypothetical protein                                                        | 3.775923  | 3.4822826 | 1.0843241 |
| PIP2;5    | putative aquaporin PIP2-5                                                   | 2.4176579 | 2.228294  | 1.0849816 |
| KCS7      | 3-ketoacyl-CoA synthase 7                                                   | 8.498386  | 7.83232   | 1.0850407 |
| AT5G64820 | hypothetical protein                                                        | 3.3860774 | 3.1200974 | 1.0852473 |
| AT5G61820 | hypothetical protein                                                        | 4.684759  | 4.315303  | 1.0856154 |
| HVA22D    | HVA22-like protein d                                                        | 9.4661875 | 8.717894  | 1.0858343 |
| AT3G11340 | UDP-glycosyltransferase-like protein                                        | 2.2768667 | 2.0968046 | 1.0858746 |
| ABF2      | abscisic acid-insensitive 5-like protein 5                                  | 3.0393274 | 2.7985919 | 1.0860202 |
| CPuORF17  | hypothetical protein                                                        | 2.8224933 | 2.5987694 | 1.0860884 |
| AT3G04000 | 3-oxoacyl-[acyl-carrier protein] reductase                                  | 2.369836  | 2.1819413 | 1.0861136 |
| BGLU31    | beta glucosidase 31                                                         | 2.633631  | 2.4239068 | 1.0865233 |
| GAMMA-TIP | aquaporin TIP1-1                                                            | 2.3673809 | 2.178098  | 1.0869029 |

|           |                                                                           |           |           |           |
|-----------|---------------------------------------------------------------------------|-----------|-----------|-----------|
| TIL       | outer membrane lipoprotein Blc                                            | 2.2303681 | 2.051126  | 1.0873872 |
| AT4G09760 | protein kinase family protein                                             | 2.3508086 | 2.161883  | 1.0873895 |
| AT4G15420 | ubiquitin fusion degradation UFD1 family protein                          | 2.408962  | 2.214969  | 1.0875828 |
| AT1G67930 | Golgi transport complex-related protein                                   | 2.2906756 | 2.1057236 | 1.087833  |
| ELIP1     | chlorophyll A-B binding, early light-inducible protein                    | 3.1024942 | 2.8519838 | 1.0878373 |
| HSC70-1   | heat shock 70kDa protein 1/8                                              | 2.6500301 | 2.4343956 | 1.0885782 |
| AT5G10695 | hypothetical protein                                                      | 3.486533  | 3.2022347 | 1.0887812 |
| AT2G47485 | hypothetical protein                                                      | 2.770049  | 2.5441642 | 1.0887855 |
| AT5G04250 | OTU-like cysteine protease family protein                                 | 3.8621643 | 3.5465868 | 1.0889806 |
| LEA14     | putative desiccation-related protein LEA14                                | 4.545418  | 4.1724725 | 1.0893823 |
| HSFA1E    | heat stress transcription factor A-1e                                     | 2.6318514 | 2.414831  | 1.08987   |
| AT4G09500 | glycosyltransferase family protein                                        | 3.407868  | 3.1263695 | 1.09004   |
| GGPS2     | geranylgeranyl pyrophosphate synthase 4                                   | 2.385812  | 2.1885247 | 1.0901463 |
| AT4G12000 | SNARE associated Golgi family protein                                     | 7.142668  | 6.551284  | 1.0902699 |
| AT4G27530 | hypothetical protein                                                      | 3.67228   | 3.365454  | 1.0911694 |
| NSP5      | nitrile specifier protein 5                                               | 3.9678423 | 3.6357746 | 1.0913334 |
| AT1G62580 | flavin-containing monooxygenase-like protein                              | 2.4706762 | 2.2629018 | 1.0918176 |
| AT5G37540 | aspartyl protease family protein                                          | 2.2797387 | 2.0873702 | 1.0921583 |
| AT5G54165 | hypothetical protein                                                      | 3.9274912 | 3.5951982 | 1.0924269 |
| FER3      | ferritin 3                                                                | 2.383022  | 2.1813817 | 1.092437  |
| AT4G03360 | Ubiquitin family protein                                                  | 15.917436 | 14.568823 | 1.0925685 |
| AT4G05010 | F-box protein                                                             | 2.289121  | 2.094541  | 1.0928986 |
| EGY3      | ethylene-dependent gravitropism-deficient and yellow-green-like 3 protein | 3.9212704 | 3.587466  | 1.0930474 |
| PIA1      | putative protein phosphatase 2C 20                                        | 33.434525 | 30.567135 | 1.0938064 |
| RD19      | cysteine proteinase RD19a                                                 | 3.275001  | 2.993046  | 1.0942034 |
| ddf2      | dehydration-responsive element-binding protein 1E                         | 10.690187 | 9.765122  | 1.0947316 |
| WRKY67    | putative WRKY transcription factor 67                                     | 4.573186  | 4.175745  | 1.0951785 |
| AT3G21890 | B-box type zinc finger-containing protein                                 | 11.611959 | 10.602055 | 1.0952556 |
| CBF2      | dehydration-responsive element-binding protein 1C                         | 2.3685188 | 2.1622603 | 1.0953902 |

|           |                                                                       |           |           |           |
|-----------|-----------------------------------------------------------------------|-----------|-----------|-----------|
| RCAR1     | abscisic acid receptor PYL9                                           | 2.6494012 | 2.4186425 | 1.0954083 |
| HAB1      | protein phosphatase 2C 16                                             | 5.294006  | 4.8278966 | 1.0965451 |
| AT2G03230 | GCK domain-containing protein                                         | 2.4653292 | 2.2480142 | 1.0966698 |
| AT4G21570 | hypothetical protein                                                  | 2.89608   | 2.640715  | 1.096703  |
| AT1G11210 | hypothetical protein                                                  | 9.156326  | 8.34798   | 1.0968314 |
| ABII      | protein phosphatase 2C 56                                             | 4.680163  | 4.2661414 | 1.0970482 |
| AT3G16940 | calmodulin-binding transcription activator                            | 2.5954406 | 2.3657775 | 1.0970773 |
| AT1G48060 | F-box protein                                                         | 2.643996  | 2.4080546 | 1.0979801 |
| AT1G19400 | Erythronate-4-phosphate dehydrogenase family protein                  | 2.2089067 | 2.0115206 | 1.0981278 |
| AT5G41460 | hypothetical protein                                                  | 2.3711069 | 2.1587813 | 1.0983543 |
| AT5G09530 | hydroxyproline-rich glycoprotein family protein                       | 2.254214  | 2.0509565 | 1.0991039 |
| BTI2      | reticulon-like protein B2                                             | 2.5167036 | 2.287466  | 1.1002146 |
| GA2OX6    | gibberellin 2-oxidase 6                                               | 2.986143  | 2.7135289 | 1.1004648 |
| SYP124    | syntaxin-124                                                          | 8.979209  | 8.152331  | 1.1014284 |
| AT5G04760 | duplicated SANT DNA-binding domain-containing protein                 | 2.491902  | 2.2623425 | 1.1014699 |
| CPUORF47  | conserved peptide upstream open reading frame 47                      | 3.4561515 | 3.1360335 | 1.1020772 |
| AT1G51980 | putative mitochondrial-processing peptidase subunit alpha-1           | 2.283489  | 2.070517  | 1.1028593 |
| AT5G42570 | B-cell receptor-associated 31-like protein                            | 2.5675826 | 2.3276696 | 1.10307   |
| AT5G58770 | dehydrodolichyl diphosphate synthase 2                                | 4.6569552 | 4.220825  | 1.1033281 |
| AT4G30470 | Rossmann-fold NAD(P)-binding domain-containing protein                | 2.3506145 | 2.1293979 | 1.103887  |
| AT5G24870 | RING/U-box domain-containing protein                                  | 2.70553   | 2.4488199 | 1.1048301 |
| AT2G38905 | Low temperature and salt responsive protein                           | 2.7985535 | 2.5326588 | 1.1049864 |
| AT1G07500 | hypothetical protein                                                  | 3.4931538 | 3.1610363 | 1.1050661 |
| AT1G30320 | Remorin family protein                                                | 2.9679046 | 2.68571   | 1.1050726 |
| AT1G60590 | Pectin lyase-like protein                                             | 3.0379233 | 2.747705  | 1.105622  |
| AT1G73390 | Endosomal targeting BRO1-like domain-containing protein               | 8.379757  | 7.579133  | 1.1056353 |
| AT1G71000 | chaperone DnaJ-domain containing protein                              | 10.471182 | 9.4704    | 1.1056747 |
| AGL91     | protein agamous-like 91                                               | 4.339707  | 3.924932  | 1.1056769 |
| AT3G27600 | SWAP (Suppressor-of-White-APricot)/surp RNA-binding domain-containing | 3.905098  | 3.531612  | 1.1057551 |

|           | protein                                                                   |           |           |           |
|-----------|---------------------------------------------------------------------------|-----------|-----------|-----------|
| AT5G60380 | hypothetical protein                                                      | 8.594811  | 7.770823  | 1.1060362 |
| NCED2     | 9-cis-epoxycarotenoid dioxygenase NCED2                                   | 3.9880927 | 3.6055593 | 1.1060954 |
| ASL9      | LOB domain-containing protein 3                                           | 4.565558  | 4.1264467 | 1.106414  |
| NF-YA5    | nuclear transcription factor Y subunit A-5                                | 3.0310512 | 2.7381244 | 1.1069809 |
| ASY1      | DNA-binding HORMA-like protein                                            | 2.7109363 | 2.4475882 | 1.107595  |
| TRANS11   | phospho-N-acetylmuramoyl-pentapeptide-transferase-like protein            | 2.6336493 | 2.3772244 | 1.1078674 |
| CPK29     | calcium-dependent protein kinase 29                                       | 3.6078553 | 3.2564929 | 1.107896  |
| HSP90.1   | heat shock protein 81-1                                                   | 3.8554122 | 3.479851  | 1.1079245 |
| SQP1      | Squalene monooxygenase 1,1                                                | 2.6402576 | 2.3828425 | 1.1080285 |
| AT1G70800 | Calcium-dependent lipid-binding domain-containing protein                 | 3.7590098 | 3.3919537 | 1.1082138 |
| AT1G19970 | ER lumen protein retaining receptor-like protein                          | 2.6913168 | 2.428256  | 1.1083332 |
| EGY3      | ethylene-dependent gravitropism-deficient and yellow-green-like 3 protein | 2.7199779 | 2.4530742 | 1.1088037 |
| NAC032    | NAC domain containing protein 32                                          | 9.1350155 | 8.234615  | 1.1093433 |
| AT1G44414 | hypothetical protein                                                      | 3.1287968 | 2.820164  | 1.109438  |
| AT5G52050 | mate efflux domain-containing protein                                     | 4.49507   | 4.047531  | 1.1105708 |
| AT5G40810 | ubiquinol-cytochrome c reductase cytochrome c1 subunit                    | 2.2238765 | 2.0017896 | 1.1109442 |
| AT1G72660 | P-loop containing nucleoside triphosphate hydrolase-like protein          | 4.7109413 | 4.239331  | 1.1112465 |
| YSL7      | putative metal-nicotianamine transporter YSL7                             | 2.5842853 | 2.3253152 | 1.1113698 |
| AT5G43420 | RING-H2 finger protein ATL16                                              | 2.7108505 | 2.4379287 | 1.1119481 |
| AT4G12400 | putative stress-inducible protein                                         | 5.180419  | 4.654038  | 1.1131021 |
| UGE2      | UDP-D-glucose/UDP-D-galactose 4-epimerase 2                               | 3.1685214 | 2.8459103 | 1.1133596 |
| AT5G49525 | hypothetical protein                                                      | 2.654994  | 2.383753  | 1.1137873 |
| AT2G47780 | Rubber elongation factor protein (REF)                                    | 3.8944383 | 3.4942553 | 1.114526  |
| NRT1.7    | nitrate transporter 1.7                                                   | 2.5847192 | 2.3187318 | 1.1147124 |
| MSP2      | microspore-specific promoter 2                                            | 3.9010472 | 3.4988353 | 1.1149559 |
| AT5G27944 | agamous-like MADS-box protein                                             | 2.4411774 | 2.1894739 | 1.1149608 |
| AT5G64230 | hypothetical protein                                                      | 2.502667  | 2.2436116 | 1.1154635 |
| AT1G30974 | Plant thionin family protein                                              | 2.5117724 | 2.2517583 | 1.1154716 |

|           |                                                                           |           |           |           |
|-----------|---------------------------------------------------------------------------|-----------|-----------|-----------|
|           | transcription factor jumonji and C5HC2 type zinc finger domain-containing |           |           |           |
| AT1G30810 | protein                                                                   | 9.998489  | 8.962871  | 1.1155454 |
| AT1G21520 | hypothetical protein                                                      | 2.4652028 | 2.2086177 | 1.1161746 |
| SSP4      | SCP1-like small phosphatase 4                                             | 2.4435904 | 2.1890607 | 1.1162734 |
| AFP1      | Ninja-family protein AFP1                                                 | 14.038125 | 12.572991 | 1.1165303 |
| TAT3      | tyrosine aminotransferase 3                                               | 2.4418836 | 2.186417  | 1.1168425 |
| AT4G07965 | hypothetical protein                                                      | 2.9938674 | 2.6803935 | 1.1169506 |
| PAP18     | purple acid phosphatase 18                                                | 2.4045472 | 2.1508474 | 1.1179534 |
| IAGLU     | indole-3-acetate beta-D-glucosyltransferase                               | 2.8249722 | 2.5258436 | 1.1184272 |
| AT1G79520 | Cation efflux family protein                                              | 10.307439 | 9.212973  | 1.1187962 |
| MYB3      | transcription factor MYB3                                                 | 2.7521787 | 2.4588003 | 1.1193177 |
| AT1G32560 | Late embryogenesis abundant protein, group 1 protein                      | 3.4346051 | 3.066657  | 1.1199834 |
| AT5G43150 | hypothetical protein                                                      | 2.9843948 | 2.6646748 | 1.1199845 |
| UPS4      | ureide permease 4                                                         | 6.8674507 | 6.131287  | 1.1200668 |
| AT2G27950 | RING/U-box domain-containing protein                                      | 2.4102888 | 2.1511004 | 1.120491  |
| SPDS3     | Spermine synthase                                                         | 3.8041651 | 3.3943894 | 1.1207215 |
| AT1G80120 | protein LURP-one-related 5                                                | 3.4245472 | 3.0549684 | 1.1209763 |
| AT2G02700 | cysteine/histidine-rich C1 domain-containing protein                      | 60.0329   | 53.547535 | 1.1211141 |
| KIN1      | stress-induced protein KIN1                                               | 4.1745033 | 3.7232132 | 1.1212097 |
| AT1G64107 | defensin-like protein 269                                                 | 6.753621  | 6.0194573 | 1.121965  |
| UKL5      | putative uracil phosphoribosyltransferase                                 | 3.0219214 | 2.693337  | 1.121999  |
| CYP71B19  | cytochrome P450 71B19                                                     | 2.2874086 | 2.0385659 | 1.1220676 |
| AT3G17720 | Pyridoxal phosphate-dependent transferase-like protein                    | 2.6100678 | 2.325095  | 1.122564  |
| AT1G73210 | hypothetical protein                                                      | 2.4479249 | 2.1790571 | 1.1233872 |
| AT1G76530 | auxin efflux carrier-like protein                                         | 3.3195662 | 2.9534101 | 1.1239773 |
| AT2G20970 | putative lipid binding protein                                            | 16.926514 | 15.056073 | 1.1242318 |
| AT5G56980 | hypothetical protein                                                      | 2.546966  | 2.263982  | 1.1249938 |
| ATSDI1    | tetratricopeptide repeat domain-containing protein                        | 11.46599  | 10.188228 | 1.1254156 |
| AT5G43150 | hypothetical protein                                                      | 3.5275614 | 3.1269152 | 1.1281283 |

|               |                                                       |                  |                 |           |
|---------------|-------------------------------------------------------|------------------|-----------------|-----------|
| AT4G26701     | DNA binding;DNA topoisomerase type Is                 | 5.470082         | 4.8486066       | 1.128176  |
| Fes1A         | protein Fes1A                                         | 3.7226646        | 3.2995365       | 1.1282387 |
| AT4G39290     | putative F-box/kelch-repeat protein                   | 5.49779          | 4.8712378       | 1.1286228 |
| AT3G22910     | Ca <sup>2+</sup> -transporting ATPase                 | 2.6373618        | 2.3366885       | 1.128675  |
| AT1G66760     | MATE efflux family protein                            | 3.1780279        | 2.8138998       | 1.1294035 |
| RAP2.1        | ethylene-responsive transcription factor RAP2-1       | 2.7282631        | 2.4153736       | 1.1295408 |
| BGLU24        | beta glucosidase 24                                   | 3.670711         | 3.2494323       | 1.1296469 |
| PIRL7         | plant intracellular ras group-related LRR 7           | 6.3823175        | 5.649216        | 1.1297705 |
| AT5G64510     | hypothetical protein                                  | 3.6039567        | 3.1899512       | 1.1297842 |
| NF-YB2        | nuclear transcription factor Y subunit B-2            | 5.5685863        | 4.9279227       | 1.1300069 |
| RAP2.10       | ethylene-responsive transcription factor RAP2-10      | 3.6580691        | 3.2363367       | 1.1303116 |
| AT3G03440     | armadillo/beta-catenin-like repeat-containing protein | 2.6294067        | 2.32516         | 1.1308497 |
| AT1G78230     | Outer arm dynein light chain 1 protein                | 2.4190967        | 2.1385598       | 1.1311802 |
| ELI3-2        | cinnamyl alcohol dehydrogenase 8                      | 4.4111104        | 3.8994024       | 1.1312274 |
| UGT73C7       | UDP-glucosyl transferase 73C7                         | 3.97081          | 3.5094244       | 1.1314703 |
| AT3G11420     | hypothetical protein                                  | 2.3142252        | 2.0447903       | 1.1317666 |
| AT3G04010     | O-Glycosyl hydrolases family 17 protein               | 2.8786142        | 2.5432227       | 1.1318766 |
| CPuORF17      | hypothetical protein                                  | 2.9853773        | 2.6341498       | 1.1333362 |
| MYB3          | transcription factor MYB3                             | 2.7550583        | 2.4307325       | 1.1334271 |
| EP3           | chitinase                                             | 3.6524053        | 3.2219176       | 1.1336123 |
| <b>NRT1.7</b> | <b>nitrate transporter 1.7</b>                        | <b>3.2098112</b> | <b>2.831233</b> | 1.1337149 |
| AT4G30650     | putative low temperature and salt responsive protein  | 2.7693224        | 2.4423711       | 1.1338663 |
| LCR41         | putative defensin-like protein 188                    | 3.163851         | 2.7901034       | 1.1339548 |
| KCS2          | 3-ketoacyl-CoA synthase 17                            | 4.567396         | 4.0259647       | 1.1344849 |
| KUOX1         | KAR-UP oxidoreductase 1                               | 2.5404394        | 2.238407        | 1.1349319 |
| CYP707A2      | abscisic acid 8'-hydroxylase 2                        | 3.0646873        | 2.6995077       | 1.1352763 |
| CT-BMY        | beta-amylase 3                                        | 2.515654         | 2.2152412       | 1.1356118 |
| AT5G61390     | exonuclease-like protein                              | 3.0060136        | 2.6459358       | 1.1360871 |
| BAC2          | Mitochondrial substrate carrier family protein        | 2.757571         | 2.4271889       | 1.1361171 |



|           |                                                                   |           |           |           |
|-----------|-------------------------------------------------------------------|-----------|-----------|-----------|
| SCL3      | scarecrow-like protein 3                                          | 3.0417817 | 2.6770654 | 1.1362373 |
| GSL09     | callose synthase                                                  | 2.3569984 | 2.0739677 | 1.1364683 |
| RHA3A     | RING-H2 finger protein ATL44                                      | 2.9229753 | 2.570964  | 1.136918  |
| AT5G56050 | hypothetical protein                                              | 2.9884002 | 2.6284368 | 1.1369495 |
| AT5G55970 | RING/U-box domain-containing protein                              | 2.4136324 | 2.122509  | 1.1371601 |
| AT4G01670 | hypothetical protein                                              | 3.1676323 | 2.785141  | 1.1373329 |
| AT2G16890 | UDP-glycosyltransferase-like protein                              | 2.9915586 | 2.629995  | 1.1374769 |
| AT5G66460 | mannan endo-1,4-beta-mannosidase 7                                | 2.289298  | 2.0119407 | 1.1378555 |
| ROF2      | peptidylprolyl isomerase                                          | 3.9892845 | 3.5055943 | 1.1379766 |
| AT4G14368 | regulator of chromosome condensation repeat-containing protein    | 6.8302183 | 6.001751  | 1.1380376 |
| FTSH6     | cell division protease ftsH-6                                     | 5.19824   | 4.567351  | 1.1381302 |
| TMAC2     | Ninja-family protein AFP4                                         | 2.388018  | 2.097366  | 1.1385794 |
| AT5G18130 | hypothetical protein                                              | 2.4156818 | 2.119171  | 1.1399183 |
| AT1G10400 | UDP-glycosyltransferase-like protein                              | 3.3557737 | 2.9413724 | 1.140887  |
| AT5G35688 | hypothetical protein                                              | 8.405684  | 7.367275  | 1.1409489 |
| AT1G01240 | hypothetical protein                                              | 2.3385165 | 2.0496173 | 1.1409527 |
| OBP1      | Dof zinc finger protein DOF3.4                                    | 2.393413  | 2.0965247 | 1.1416098 |
| GolS3     | galactinol synthase 3                                             | 3.146311  | 2.7558854 | 1.1416698 |
| ERD4      | Early-responsive to dehydration stress protein (ERD4)             | 2.3009179 | 2.015283  | 1.1417344 |
| AT1G78070 | transducin/WD-40 repeat-containing protein                        | 9.190788  | 8.049211  | 1.1418248 |
| AT3G28007 | nodulin MtN3-like protein                                         | 5.447927  | 4.768594  | 1.1424599 |
| HSP17.4   | heat shock protein 17.4                                           | 7.0573945 | 6.1768003 | 1.1425648 |
| AT1G05894 | hypothetical protein                                              | 3.388619  | 2.965552  | 1.1426604 |
| HAI2      | protein phosphatase 2C 3                                          | 34.537853 | 30.197636 | 1.1437271 |
| AT1G21790 | TRAM, LAG1 and CLN8 (TLC) lipid-sensing domain containing protein | 5.582898  | 4.879698  | 1.1441073 |
| AT1G64890 | integral membrane transporter family protein                      | 2.8663251 | 2.5047789 | 1.1443427 |
| GSTU2     | glutathione S-transferase                                         | 2.4722152 | 2.1597533 | 1.1446748 |
| MTM1      | manganese tracking factor for mitochondrial SOD2                  | 3.016761  | 2.634924  | 1.1449139 |
| AT5G41900 | hydrolase, alpha/beta fold family protein                         | 3.0837631 | 2.6906037 | 1.1461232 |

|           |                                                 |           |           |           |
|-----------|-------------------------------------------------|-----------|-----------|-----------|
| UGT73C1   | cytokinin-O-glucosyltransferase 1               | 9.295618  | 8.108049  | 1.1464679 |
| AT4G28140 | ethylene-responsive transcription factor ERF054 | 17.248396 | 15.043074 | 1.1466006 |
| FIB       | putative plastid-lipid-associated protein 1     | 2.8548055 | 2.4893782 | 1.1467947 |
| EXL2      | protein EXORDIUM like 2                         | 2.4644418 | 2.1482143 | 1.1472048 |
| SKP2A     | F-box protein SKP2A                             | 3.0304663 | 2.6412368 | 1.1473664 |
| AT3G18950 | transducin/WD40 domain-containing protein       | 2.4769785 | 2.1587086 | 1.1474354 |
| AT1G55530 | RING/U-box domain-containing protein            | 2.3396761 | 2.038066  | 1.1479884 |
| Fes1A     | protein Fes1A                                   | 4.011439  | 3.4894564 | 1.1495885 |
| AT5G20370 | serine-rich protein-like protein                | 4.0062213 | 3.4840517 | 1.1498742 |
| AT3G22090 | hypothetical protein                            | 3.1283014 | 2.720359  | 1.149959  |
| JAZ5      | protein TIFY 11A                                | 2.682268  | 2.33031   | 1.1510347 |
| AT1G47610 | WD40 domain-containing protein                  | 4.53364   | 3.9386642 | 1.1510602 |
| AT5G51105 | hypothetical protein                            | 4.193425  | 3.6429195 | 1.1511166 |
| CPuORF12  | uncharacterized protein                         | 2.6636357 | 2.3132586 | 1.1514647 |
| AT3G20340 | hypothetical protein                            | 4.125132  | 3.5815918 | 1.1517594 |
| RAP2.4    | ethylene-responsive transcription factor RAP2-4 | 2.5177004 | 2.1854417 | 1.1520327 |
| AT2G25460 | hypothetical protein                            | 3.412322  | 2.9572568 | 1.153881  |
| AT3G55090 | ABC transporter G family member 16              | 11.496925 | 9.956196  | 1.1547508 |
| ANK       | ankyrin repeat family protein                   | 2.4409895 | 2.1135623 | 1.1549172 |
| NTM1      | NAC domain-containing protein 68                | 2.9816558 | 2.580267  | 1.155561  |
| AT5G22545 | hypothetical protein                            | 2.614693  | 2.262353  | 1.1557405 |
| AT4G05140 | Nucleoside transporter family protein           | 2.7154884 | 2.349308  | 1.1558673 |
| AT2G03460 | galactose oxidase/kelch-like protein            | 4.3624864 | 3.77273   | 1.1563209 |
| FLA3      | fasciclin-like arabinogalactan protein 3        | 2.6533325 | 2.2942808 | 1.1564986 |
| LCR18     | putative defensin-like protein 184              | 2.8078706 | 2.4274669 | 1.1567081 |
| WRKY48    | putative WRKY transcription factor 48           | 2.6301003 | 2.2732198 | 1.1569934 |
| ERD9      | glutathione S-transferase                       | 3.2355237 | 2.7964063 | 1.1570293 |
| EDL3      | EID1-like F-box protein 3                       | 28.205553 | 24.375242 | 1.1571394 |
| PP2-A10   | phloem protein 2-A10                            | 2.9851031 | 2.5793035 | 1.1573291 |

|           |                                                                               |           |           |           |
|-----------|-------------------------------------------------------------------------------|-----------|-----------|-----------|
| AT2G23120 | Late embryogenesis abundant protein, group 6                                  | 3.494842  | 3.0162187 | 1.1586833 |
| SR1       | CBL-interacting serine/threonine-protein kinase 14                            | 2.3380404 | 2.017549  | 1.1588517 |
| AT2G33580 | protein kinase family protein                                                 | 2.9104564 | 2.5108294 | 1.1591613 |
| AT1G63080 | pentatricopeptide repeat-containing protein                                   | 4.5246625 | 3.903329  | 1.1591805 |
| ALDH2B7   | aldehyde dehydrogenase 2B7                                                    | 2.8040714 | 2.4186425 | 1.1593575 |
| AT5G56160 | sec14p-like phosphatidylinositol transfer-like protein                        | 2.525246  | 2.1775882 | 1.1596526 |
| AT4G28150 | hypothetical protein                                                          | 3.1197178 | 2.6889803 | 1.1601863 |
| AT2G03740 | late embryogenesis abundant domain-containing protein                         | 2.5336673 | 2.1835651 | 1.1603351 |
| AT5G16380 | hypothetical protein                                                          | 2.4409008 | 2.1031597 | 1.1605874 |
| NAP       | NAC domain-containing protein 29                                              | 2.9324236 | 2.522935  | 1.1623064 |
| MYB32     | transcription factor MYB32                                                    | 2.717108  | 2.3373356 | 1.1624808 |
| ICS2      | Isochorismate synthase 2                                                      | 4.163741  | 3.5755196 | 1.1645136 |
| AT2G41870 | remorin-like protein                                                          | 2.7869558 | 2.389041  | 1.1665584 |
| ATS1      | caleosin 1                                                                    | 7.1638966 | 6.1407948 | 1.1666074 |
| AT1G76590 | PLATZ transcription factor domain-containing protein                          | 4.13343   | 3.541941  | 1.1669958 |
| ERD9      | glutathione S-transferase                                                     | 2.834679  | 2.4289224 | 1.167052  |
| AT5G41320 | hypothetical protein                                                          | 2.6564834 | 2.2758992 | 1.1672237 |
| AT4G12000 | SNARE associated Golgi family protein                                         | 6.2684655 | 5.3694634 | 1.1674286 |
| IQD22     | protein IQ-domain 22                                                          | 2.4226606 | 2.0750697 | 1.1675081 |
| AT1G24600 | hypothetical protein                                                          | 9.039624  | 7.741478  | 1.1676872 |
| AT3G56790 | RNA splicing factor-related protein                                           | 2.400503  | 2.0552382 | 1.1679925 |
| AT4G16750 | ethylene-responsive transcription factor ERF039                               | 2.5704    | 2.2000365 | 1.1683443 |
| AT1G19970 | ER lumen protein retaining receptor-like protein                              | 2.554572  | 2.1857524 | 1.1687381 |
| AT3G60110 | DNA-binding bromodomain-containing protein                                    | 2.814867  | 2.407082  | 1.1694105 |
| AT4G22620 | SAUR-like auxin-responsive protein                                            | 7.040787  | 6.0132275 | 1.1708833 |
| GolS2     | galactinol synthase 2                                                         | 26.17591  | 22.323755 | 1.1725587 |
| AT3G18490 | aspartyl protease family protein                                              | 3.4763792 | 2.9635837 | 1.1730323 |
| AT3G49130 | SWAP (Suppressor-of-White-APricot)/surp RNA-binding domain-containing protein | 16.063055 | 13.689824 | 1.1733572 |

|            |                                                                                |           |           |           |
|------------|--------------------------------------------------------------------------------|-----------|-----------|-----------|
| CYP722A1   | cytochrome P450, family 722, subfamily A, polypeptide 1                        | 9.0365715 | 7.696871  | 1.1740578 |
| TSPO       | tryptophan-rich sensory protein-like protein                                   | 31.560072 | 26.87062  | 1.1745197 |
| AT4G14225  | putative zinc finger A20 and AN1 domain-containing stress-associated protein 8 | 7.8847184 | 6.710889  | 1.1749142 |
| PKT3       | 3-ketoacyl-CoA thiolase 2                                                      | 2.7685745 | 2.355512  | 1.1753601 |
| AT1G20320  | haloacid dehalogenase-like hydrolase                                           | 5.896794  | 5.0164056 | 1.1755018 |
| NAC3       | NAC domain-containing protein 55                                               | 2.585483  | 2.199372  | 1.1755551 |
| AT3G03170  | hypothetical protein                                                           | 5.0182776 | 4.264526  | 1.1767493 |
| AT3G15670  | late embryogenesis abundant domain-containing protein                          | 91.59765  | 77.83951  | 1.1767501 |
| AT3G11325  | acyltransferase                                                                | 12.622323 | 10.726061 | 1.1767901 |
| AT1G53540  | HSP20-like chaperone                                                           | 4.3957415 | 3.7338781 | 1.177259  |
| AT5G41590  | hypothetical protein                                                           | 9.160335  | 7.7711697 | 1.1787587 |
| AT2G24560  | GDSL esterase/lipase                                                           | 5.917697  | 5.0189447 | 1.179072  |
| AT4G23493  | hypothetical protein                                                           | 2.8660429 | 2.4289641 | 1.1799445 |
| AT3G63360  | defensin-like protein 11                                                       | 3.311968  | 2.8059034 | 1.1803572 |
| AT1G05894  | hypothetical protein                                                           | 4.349819  | 3.6836681 | 1.1808391 |
| AT5G01520  | RING/U-box domain-containing protein                                           | 3.4943593 | 2.9582481 | 1.1812259 |
| AT1G64380  | ethylene-responsive transcription factor ERF061                                | 9.978354  | 8.4469595 | 1.1812954 |
| HVA22B     | HVA22-like protein b                                                           | 4.1888466 | 3.5449507 | 1.1816375 |
| AT4G11570  | haloacid dehalogenase-like hydrolase domain-containing protein                 | 2.5987797 | 2.1988807 | 1.1818649 |
| MYB112     | myb domain protein 112                                                         | 3.5083878 | 2.9673278 | 1.1823392 |
| RPS2       | disease resistance protein RPS2                                                | 3.745633  | 3.165398  | 1.1833055 |
| DIN2       | beta-glucosidase 30                                                            | 7.4110255 | 6.262936  | 1.1833149 |
| AT4G16146  | cAMP-regulated phosphoprotein 19-related protein                               | 2.8592908 | 2.4151773 | 1.1838845 |
| COR413-PM1 | cold regulated 413 plasma membrane 1                                           | 4.290205  | 3.620758  | 1.1848913 |
| DGK1       | diacylglycerol kinase1                                                         | 3.280598  | 2.768559  | 1.1849477 |
| ERD10      | dehydrin ERD10                                                                 | 6.694911  | 5.6494923 | 1.1850464 |
| AT1G55230  | hypothetical protein                                                           | 2.7906263 | 2.3547063 | 1.1851271 |
| DREB2A     | dehydration-responsive element-binding protein 2A                              | 11.521972 | 9.719184  | 1.1854876 |
| HSP70T-2   | heat-shock protein 70T-2                                                       | 3.89698   | 3.2847185 | 1.186397  |

|           |                                                                  |           |           |           |
|-----------|------------------------------------------------------------------|-----------|-----------|-----------|
| AT3G51750 | hypothetical protein                                             | 7.004666  | 5.9037676 | 1.1864738 |
| AT5G35660 | glycine-rich protein                                             | 2.874675  | 2.4203956 | 1.1876881 |
| AT1G70130 | concanavalin A-like lectin protein kinase                        | 4.7565393 | 4.0023513 | 1.1884362 |
| AT3G50390 | transducin/WD40 domain-containing protein                        | 2.6714907 | 2.2472682 | 1.1887724 |
| BHLH92    | transcription factor bHLH92                                      | 3.8179176 | 3.2106175 | 1.1891537 |
| AT5G01880 | RING-H2 finger protein ATL74                                     | 5.2359476 | 4.4027963 | 1.1892322 |
| AT2G38240 | 2-oxoglutarate (2OG) and Fe(II)-dependent oxygenase-like protein | 5.7097354 | 4.799627  | 1.1896207 |
| AT5G15180 | peroxidase 56                                                    | 3.0272627 | 2.542478  | 1.1906741 |
| RKP       | ubiquitination-promoting complex protein 1                       | 2.8211074 | 2.3687906 | 1.1909485 |
| AT5G40645 | RPM1-interacting protein 4 (RIN4)                                | 2.9687355 | 2.4923    | 1.191163  |
| AT3G17770 | Dihydroxyacetone kinase                                          | 4.526143  | 3.7982903 | 1.1916264 |
| AT1G80320 | 2-oxoglutarate (2OG) and Fe(II)-dependent oxygenase-like protein | 2.6596525 | 2.2317133 | 1.1917537 |
| AT2G27270 | hypothetical protein                                             | 15.074888 | 12.642724 | 1.1923766 |
| AT3G53820 | C2H2 and C2HC zinc finger-containing protein                     | 3.1731305 | 2.6602802 | 1.1927806 |
| AT5G07610 | F-box protein                                                    | 2.4658613 | 2.0668488 | 1.1930535 |
| AT1G62840 | hypothetical protein                                             | 2.580371  | 2.1609244 | 1.1941051 |
| AT1G74010 | strictosidine synthase                                           | 2.5293808 | 2.118021  | 1.1942189 |
| UGT73B3   | UDP-glucosyl transferase 73B3                                    | 2.5483115 | 2.1306427 | 1.1960295 |
| DGL       | galactolipase DONGLE                                             | 3.177112  | 2.6549973 | 1.1966536 |
| HFR1      | transcription factor HFR1                                        | 3.320805  | 2.7745426 | 1.1968838 |
| AT3G56260 | hypothetical protein                                             | 6.1358604 | 5.1262045 | 1.1969597 |
| ASY1      | DNA-binding HORMA-like protein                                   | 2.6026511 | 2.1743505 | 1.1969787 |
| AT1G54070 | Dormancy/auxin associated family protein                         | 2.8301773 | 2.3640933 | 1.1971512 |
| AT1G62975 | transcription factor bHLH125                                     | 2.5699496 | 2.1465564 | 1.197243  |
| HAI1      | protein phosphatase                                              | 66.85151  | 55.809277 | 1.1978565 |
| AT4G35985 | senescence/dehydration-associated protein                        | 5.5125723 | 4.601352  | 1.1980331 |
| 42282     | organic cation/carnitine transporter5                            | 2.530406  | 2.1105773 | 1.1989164 |
| CID11     | CTC-interacting domain 11 protein                                | 2.6687126 | 2.2241845 | 1.1998612 |
| AT5G17460 | hypothetical protein                                             | 15.283972 | 12.736639 | 1.2000003 |

|           |                                                                |           |           |           |
|-----------|----------------------------------------------------------------|-----------|-----------|-----------|
| HSFA6B    | heat stress transcription factor A-6b                          | 101.43073 | 84.51273  | 1.2001828 |
| RAP2.4    | ethylene-responsive transcription factor RAP2-4                | 2.423894  | 2.0164971 | 1.202032  |
| SCL14     | scarecrow-like protein 14                                      | 2.7286906 | 2.2689471 | 1.2026241 |
| AT5G52390 | PAR1 protein                                                   | 4.3659196 | 3.6251192 | 1.204352  |
| TET4      | tetraspanin4                                                   | 3.390391  | 2.8134413 | 1.2050692 |
| HSFC1     | heat stress transcription factor C-1                           | 3.6190183 | 3.0010679 | 1.2059102 |
| NAC089    | NAC domain containing protein 89                               | 2.56097   | 2.1230688 | 1.2062587 |
| PMZ       | zinc finger AN1 domain-containing stress-associated protein 12 | 3.311699  | 2.7452433 | 1.2063408 |
| AT5G25450 | ubiquinol-cytochrome c reductase subunit 7                     | 3.0824528 | 2.5542884 | 1.2067754 |
| AT4G15450 | Senescence/dehydration-associated protein-like protein         | 2.4628475 | 2.0390902 | 1.207817  |
| AT2G32235 | hypothetical protein                                           | 3.6846604 | 3.049575  | 1.2082537 |
| AT3G17770 | Dihydroxyacetone kinase                                        | 3.0525408 | 2.5252383 | 1.208813  |
| AT3G22275 | hypothetical protein                                           | 6.5429745 | 5.412353  | 1.2088965 |
| AT1G24330 | U-box domain-containing protein 6                              | 2.640151  | 2.1839197 | 1.2089049 |
| DEAR3     | ethylene-responsive transcription factor ERF008                | 2.5251458 | 2.0884163 | 1.2091198 |
| AT4G16146 | cAMP-regulated phosphoprotein 19-related protein               | 2.7725148 | 2.2923796 | 1.2094483 |
| AT5G10410 | putative clathrin assembly protein                             | 3.0024548 | 2.4820235 | 1.2096803 |
| AT3G29670 | HXXXD-type acyl-transferase-like protein                       | 6.8557076 | 5.6668735 | 1.2097867 |
| AFP2      | Ninja-family protein AFP2                                      | 3.103686  | 2.5640886 | 1.2104442 |
| LCR3      | defensin-like protein 141                                      | 6.9223948 | 5.7170963 | 1.2108235 |
| AT1G33500 | hypothetical protein                                           | 2.5536125 | 2.1060994 | 1.2124842 |
| AT5G64230 | hypothetical protein                                           | 2.6892807 | 2.215682  | 1.2137485 |
| PP2-B1    | F-box protein PP2-B1                                           | 2.7210875 | 2.2414415 | 1.21399   |
| ERD7      | senescence/dehydration related protein                         | 9.682555  | 7.9756317 | 1.2140173 |
| NSP5      | nitrile specifier protein 5                                    | 2.6620235 | 2.192145  | 1.2143464 |
| AT5G04170 | putative calcium-binding protein CML50                         | 2.8870714 | 2.3764293 | 1.2148778 |
| GEX3      | gamete-expressed 3                                             | 2.8451996 | 2.341688  | 1.2150209 |
| MYB305    | myb domain protein 305                                         | 13.399659 | 11.024014 | 1.2154973 |
| AT4G06688 | hypothetical protein                                           | 2.8483894 | 2.343368  | 1.2155108 |

|           |                                                           |           |           |           |
|-----------|-----------------------------------------------------------|-----------|-----------|-----------|
| CDT1      | cadmium tolerance 1                                       | 2.9760635 | 2.446503  | 1.2164562 |
| LEA18     | late embryogenesis abundant group 1 protein               | 21.917835 | 18.008322 | 1.2170948 |
| AT3G48240 | octicosapeptide/Phox/Bem1p domain-containing protein      | 6.495038  | 5.3325987 | 1.2179874 |
| AT4G33905 | Peroxisomal membrane 22 kDa (Mpv17/PMP22) family protein  | 12.659516 | 10.3938   | 1.2179874 |
| NTMC2T6.2 | calcium-dependent lipid-binding domain-containing protein | 4.165236  | 3.4179142 | 1.2186486 |
| HAI3      | putative protein phosphatase 2C 24                        | 509.75458 | 418.1764  | 1.2189941 |
| UBQ3      | polyubiquitin 3                                           | 2.8028557 | 2.2989187 | 1.2192061 |
| INVH      | invertase H                                               | 3.67299   | 3.012369  | 1.2193029 |
| NAC019    | NAC domain-containing protein 19                          | 19.593796 | 16.051931 | 1.2206504 |
| AT1G11925 | stigma-specific stig1-like protein                        | 3.0285997 | 2.481085  | 1.2206755 |
| AT3G17400 | F-box protein                                             | 2.7180097 | 2.2264786 | 1.2207662 |
| AT3G17770 | Dihydroxyacetone kinase                                   | 3.8969157 | 3.1907916 | 1.2213006 |
| CSLD1     | cellulose synthase-like protein D1                        | 13.635419 | 11.153275 | 1.2225485 |
| ProT3     | proline transporter 3                                     | 3.870038  | 3.1643646 | 1.2230064 |
| UGE5      | UDP-D-glucose/UDP-D-galactose 4-epimerase 5               | 3.1042955 | 2.5365236 | 1.2238386 |
| AT5G13880 | hypothetical protein                                      | 3.116898  | 2.5463667 | 1.2240571 |
| AT5G13200 | GEM-like protein 5                                        | 4.2727766 | 3.490663  | 1.2240586 |
| BIM1      | transcription factor BIM1                                 | 2.8531575 | 2.3283477 | 1.2254002 |
| PP2-B11   | F-box protein PP2-B11                                     | 4.6371756 | 3.7836304 | 1.2255889 |
| MYB2      | myb domain protein 2                                      | 3.3979163 | 2.7714539 | 1.2260411 |
| EDA9      | D-3-phosphoglycerate dehydrogenase                        | 2.913004  | 2.374837  | 1.2266122 |
| AT1G30280 | chaperone DnaJ-domain-containing protein                  | 2.7322283 | 2.2271342 | 1.226791  |
| TIP2;2    | putative aquaporin TIP2-2                                 | 2.9032602 | 2.3664594 | 1.2268372 |
| AT4G38030 | Rhamnogalacturonate lyase family protein                  | 2.6018617 | 2.120687  | 1.2268956 |
| ASL9      | LOB domain-containing protein 3                           | 5.2906547 | 4.308767  | 1.2278814 |
| AT1G32860 | glucan endo-1,3-beta-glucosidase 11                       | 4.7005563 | 3.8278756 | 1.2279804 |
| AT2G14290 | F-box protein                                             | 4.78942   | 3.898029  | 1.2286775 |
| AT2G21130 | Peptidyl-prolyl cis-trans isomerase CYP19-2               | 3.3350537 | 2.7135038 | 1.229058  |
| AT3G49200 | O-acyltransferase (WSD1-like) family protein              | 2.9677339 | 2.4133499 | 1.2297155 |

|           |                                                                          |           |           |           |
|-----------|--------------------------------------------------------------------------|-----------|-----------|-----------|
| AT1G07870 | putative serine/threonine-protein kinase RLCKVII                         | 2.4617667 | 2.0006943 | 1.2304562 |
| RABA6b    | RAB GTPase homolog A6B                                                   | 3.0625    | 2.4872217 | 1.2312936 |
| AT4G19870 | putative F-box/kelch-repeat protein                                      | 2.8483589 | 2.3116186 | 1.2321924 |
| AT4G14810 | hypothetical protein                                                     | 2.9126728 | 2.3599694 | 1.2341994 |
| AT2G22590 | UDP-glycosyltransferase-like protein                                     | 3.1921325 | 2.5859854 | 1.2343968 |
| RD26      | NAC domain-containing protein 72                                         | 13.311709 | 10.778733 | 1.2349976 |
| LSU3      | response to low sulfur 3 protein                                         | 11.908008 | 9.640079  | 1.2352605 |
| MYB79     | myb domain protein 79                                                    | 40.918556 | 33.108242 | 1.2359024 |
| BOR4      | boron transporter 4                                                      | 6.053803  | 4.8969693 | 1.2362345 |
| GolS4     | galactinol synthase 4                                                    | 9.668084  | 7.8051867 | 1.2386743 |
| AT1G52990 | thioesterase-like protein                                                | 9.10927   | 7.3494678 | 1.2394463 |
| AT4G29930 | transcription factor bHLH27                                              | 5.7332225 | 4.623246  | 1.240086  |
| AT1G32950 | Subtilase-like protein                                                   | 6.0159845 | 4.849748  | 1.2404737 |
| AT5G24870 | RING/U-box domain-containing protein                                     | 3.0807018 | 2.4777145 | 1.2433643 |
| AT1G02030 | C2H2-like zinc finger protein                                            | 3.409178  | 2.7363014 | 1.2459074 |
| AT3G56080 | dehydration-responsive protein-like protein                              | 2.8349    | 2.2740946 | 1.246606  |
| AT3G19920 | hypothetical protein                                                     | 4.509637  | 3.6174362 | 1.246639  |
| AT4G35560 | transducin/WD40 domain-containing protein                                | 4.597613  | 3.682522  | 1.2484957 |
| AT5G53710 | hypothetical protein                                                     | 46.123013 | 36.935677 | 1.2487388 |
| LTI78     | low-temperature-responsive protein 78/desiccation-responsive protein 29A | 36.52818  | 29.240479 | 1.2492334 |
| AT1G22290 | 14-3-3 family protein                                                    | 2.9284112 | 2.3399024 | 1.25151   |
| AT4G18280 | glycine-rich cell wall protein-like protein                              | 4.8712506 | 3.88465   | 1.2539741 |
| NAP       | NAC domain-containing protein 29                                         | 2.780815  | 2.2166123 | 1.2545338 |
| AT1G23450 | pentatricopeptide repeat-containing protein-like protein                 | 3.007073  | 2.3953218 | 1.255394  |
| AT5G53710 | hypothetical protein                                                     | 55.140335 | 43.880043 | 1.2566154 |
| AT4G30350 | heat shock-related protein                                               | 2.5273533 | 2.003382  | 1.2615434 |
| AT5G59490 | haloacid dehalogenase-like hydrolase domain-containing protein           | 2.7441437 | 2.1748896 | 1.2617394 |
| AtIPCS1   | inositol phosphorylceramide synthase 1                                   | 3.853695  | 3.0497243 | 1.2636207 |
| AT2G29500 | HSP20 family protein                                                     | 3.5820584 | 2.833905  | 1.2640009 |



|           |                                                                            |           |           |           |
|-----------|----------------------------------------------------------------------------|-----------|-----------|-----------|
| ABF3      | abscisic acid-insensitive 5-like protein 6                                 | 8.007179  | 6.333902  | 1.264178  |
| MAPKKK15  | mitogen-activated protein kinase kinase kinase 15                          | 3.2776606 | 2.59016   | 1.265428  |
| AT4G22980 | hypothetical protein                                                       | 2.914517  | 2.3009543 | 1.2666557 |
| AT1G79520 | Cation efflux family protein                                               | 8.028088  | 6.334635  | 1.2673324 |
| CYP89A5   | cytochrome P450, family 89, subfamily A, polypeptide 5                     | 2.8156412 | 2.2200599 | 1.2682728 |
| AT1G75860 | hypothetical protein                                                       | 2.793068  | 2.2019744 | 1.2684379 |
| AT1G80450 | VQ motif-containing protein                                                | 2.6401143 | 2.0809405 | 1.268712  |
| NF-YC2    | nuclear transcription factor Y subunit C-2                                 | 4.605859  | 3.6295838 | 1.2689772 |
| AT1G49450 | WD40 domain-containing protein                                             | 34.732895 | 27.365553 | 1.2692196 |
| LSU1      | response to low sulfur 1 protein                                           | 8.9673    | 7.0602317 | 1.2701143 |
| AT3G21320 | hypothetical protein                                                       | 3.2183516 | 2.5332966 | 1.2704203 |
| AT2G04420 | RNase H domain-containing protein                                          | 2.898132  | 2.2807863 | 1.2706723 |
| AT1G51770 | Core-2/I-branching beta-1,6-N-acetylglucosaminyltransferase family protein | 6.1049123 | 4.7996097 | 1.2719603 |
| SIP4      | CBL-interacting serine/threonine-protein kinase 11                         | 6.2254243 | 4.887158  | 1.2738333 |
| AT5G04250 | OTU-like cysteine protease family protein                                  | 4.6075644 | 3.616297  | 1.2741112 |
| COR47     | dehydrin COR47                                                             | 2.7671063 | 2.168047  | 1.276313  |
| SKP2B     | F-box/LRR-repeat protein 5                                                 | 3.4377475 | 2.6929097 | 1.2765923 |
| DREB2A    | dehydration-responsive element-binding protein 2A                          | 11.60414  | 9.089159  | 1.2767011 |
| ZF2       | zinc-finger protein 2                                                      | 3.83027   | 2.999478  | 1.2769789 |
| AT5G17850 | Sodium/calcium exchanger family protein                                    | 11.147094 | 8.716741  | 1.2788144 |
| HSA32     | Aldolase-type TIM barrel family protein                                    | 3.2881532 | 2.5708604 | 1.2790089 |
| AtS40-3   | protein AtS40-3                                                            | 4.334894  | 3.3881652 | 1.2794224 |
| TIP2;3    | aquaporin TIP2-3                                                           | 21.143965 | 16.524345 | 1.2795645 |
| RAN4      | GTP-binding nuclear protein Ran-4                                          | 3.1913872 | 2.4940856 | 1.279582  |
| CYP706A7  | cytochrome P450, family 706, subfamily A, polypeptide 7                    | 4.6979265 | 3.6708953 | 1.2797768 |
| AT1G76470 | Rossmann-fold NAD(P)-binding domain-containing protein                     | 2.7645924 | 2.1569483 | 1.2817147 |
| MSL5      | mechanosensitive channel of small conductance-like 5                       | 4.1471663 | 3.2338688 | 1.2824165 |
| PDLP1     | cysteine-rich repeat secretory protein 56                                  | 2.9130993 | 2.271473  | 1.2824715 |
| AT4G34400 | AP2/B3 domain-containing protein                                           | 4.6599145 | 3.6330838 | 1.2826334 |

|           |                                                                               |           |            |           |
|-----------|-------------------------------------------------------------------------------|-----------|------------|-----------|
| AT2G34990 | RING-H2 finger protein ATL38                                                  | 4.2761064 | 3.3324423  | 1.2831749 |
| AT5G23950 | calcium-dependent lipid-binding domain-containing protein                     | 4.0756063 | 3.1759741  | 1.2832619 |
| AT1G64380 | ethylene-responsive transcription factor ERF061                               | 7.124656  | 5.54967    | 1.2837981 |
| AT5G54420 | hypothetical protein                                                          | 2.966461  | 2.3100643  | 1.2841465 |
| FH8       | formin-like protein 8                                                         | 2.8104384 | 2.1874723  | 1.284788  |
| AT5G56160 | sec14p-like phosphatidylinositol transfer-like protein                        | 2.6635425 | 2.070697   | 1.2863023 |
|           | SWAP (Suppressor-of-White-APricot)/surp RNA-binding domain-containing protein |           |            |           |
| AT3G49130 | protein                                                                       | 16.93192  | 13.1600485 | 1.2866153 |
| AT3G61900 | SAUR-like auxin-responsive protein                                            | 4.422149  | 3.436823   | 1.2866969 |
| AT4G20320 | putative CTP synthase                                                         | 3.8301764 | 2.9729528  | 1.2883408 |
| AT2G21320 | B-box zinc finger-like protein                                                | 2.8001277 | 2.1732152  | 1.2884724 |
| AT1G78840 | putative F-box/FBD/LRR-repeat protein                                         | 2.6390636 | 2.0467825  | 1.2893717 |
| AT2G25690 | hypothetical protein                                                          | 3.973685  | 3.0769622  | 1.2914313 |
| AT3G53230 | cell division control protein 48-D                                            | 4.5142794 | 3.4954522  | 1.2914722 |
| MAPKKK17  | mitogen-activated protein kinase kinase kinase 17                             | 7.6180534 | 5.89711    | 1.2918283 |
| AT5G38240 | Protein kinase family protein                                                 | 3.193938  | 2.47218    | 1.2919521 |
| AT2G34030 | calcium-binding EF-hand-containing protein                                    | 2.6133347 | 2.0216582  | 1.2926688 |
| AT4G02950 | Ubiquitin family protein                                                      | 20.45135  | 15.81007   | 1.2935647 |
| NAC080    | NAC domain containing protein 80                                              | 6.628264  | 5.1162148  | 1.2955406 |
| AT4G23450 | RING/U-box domain-containing protein                                          | 3.5169442 | 2.7138069  | 1.2959449 |
| MYB74     | myb domain protein 74                                                         | 9.845511  | 7.5962043  | 1.2961093 |
| UGT75B1   | indole-3-acetate beta-glucosyltransferase 1                                   | 4.5053596 | 3.4743507  | 1.2967486 |
| UGT84A1   | UDP-glycosyltransferase-like protein                                          | 2.8617415 | 2.2063003  | 1.2970771 |
| MES9      | methyl esterase 9                                                             | 2.626153  | 2.0233161  | 1.297945  |
| AT3G01830 | putative calcium-binding protein CML40                                        | 7.5291576 | 5.798533   | 1.298459  |
| TIP2;3    | aquaporin TIP2-3                                                              | 14.651527 | 11.274096  | 1.2995745 |
| AT3G43270 | pectinesterase 32                                                             | 3.412841  | 2.6259933  | 1.299638  |
| AT1G67856 | RING/U-box domain-containing protein                                          | 8.415128  | 6.4617357  | 1.3023015 |
| AT1G16850 | hypothetical protein                                                          | 7.184984  | 5.515233   | 1.3027526 |

|           |                                                                           |           |           |           |
|-----------|---------------------------------------------------------------------------|-----------|-----------|-----------|
| AFP3      | Ninja-family protein AFP3                                                 | 7.427146  | 5.7004957 | 1.3028947 |
| CYP81D1   | cytochrome P450 CYP81D11                                                  | 5.500738  | 4.2159734 | 1.3047374 |
| AT2G40435 | hypothetical protein                                                      | 2.6752682 | 2.0501606 | 1.3049065 |
| AT3G17130 | plant invertase/pectin methylesterase inhibitor domain-containing protein | 5.7310777 | 4.388123  | 1.306043  |
| AT1G52855 | hypothetical protein                                                      | 6.411806  | 4.901335  | 1.3081754 |
| CIPK18    | CBL-interacting serine/threonine-protein kinase 18                        | 2.975723  | 2.2736242 | 1.3088017 |
| HSP70     | heat shock protein 70-4                                                   | 3.4307554 | 2.619421  | 1.3097382 |
| AT4G39360 | hypothetical protein                                                      | 6.2939343 | 4.800522  | 1.3110938 |
| AT5G35320 | hypothetical protein                                                      | 2.7345736 | 2.083586  | 1.3124361 |
| LCR6      | putative defensin-like protein 126                                        | 4.0966916 | 3.1182525 | 1.313778  |
| AT1G68500 | hypothetical protein                                                      | 6.4678617 | 4.9194894 | 1.3147424 |
| RLP33     | receptor like protein 33                                                  | 3.9084527 | 2.9716895 | 1.3152292 |
| AT2G20625 | hypothetical protein                                                      | 8.549455  | 6.4991913 | 1.3154644 |
| ABF3      | abscisic acid-insensitive 5-like protein 6                                | 7.0449123 | 5.3510985 | 1.3165357 |
| ERF4      | ethylene-responsive transcription factor 4                                | 3.1781518 | 2.4132621 | 1.3169526 |
| AT2G21237 | hypothetical protein                                                      | 4.2366695 | 3.2151127 | 1.3177359 |
| AT4G39360 | hypothetical protein                                                      | 6.0873685 | 4.6191893 | 1.3178436 |
| AT4G35655 | putative nitrate-responsive NOI protein                                   | 7.0149503 | 5.318484  | 1.3189756 |
| AT1G11925 | stigma-specific stig1-like protein                                        | 2.7161043 | 2.0576062 | 1.320031  |
| SNRK2.7   | serine/threonine-protein kinase SRK2F                                     | 2.8907666 | 2.18977   | 1.3201236 |
| TLP3      | Tubby-like F-box protein 3                                                | 2.8254642 | 2.1402564 | 1.3201523 |
| AT5G44065 | hypothetical protein                                                      | 4.289636  | 3.2486322 | 1.3204439 |
| AT3G22920 | peptidylprolyl isomerase                                                  | 2.7625847 | 2.0899024 | 1.3218726 |
| CYP71B10  | cytochrome P450 71B10                                                     | 4.0675874 | 3.0747805 | 1.3228871 |
| AT3G03272 | hypothetical protein                                                      | 2.7888222 | 2.1079986 | 1.3229716 |
| DEAR3     | ethylene-responsive transcription factor ERF008                           | 2.814374  | 2.1205456 | 1.3271934 |
| UGT76E1   | UDP-glucosyl transferase 76E1                                             | 4.152731  | 3.1269348 | 1.3280517 |
| AT4G25433 | peptidoglycan-binding LysM domain-containing protein                      | 16.330198 | 12.29054  | 1.3286804 |
| AT5G01200 | duplicated SANT DNA-binding domain-containing protein                     | 3.160988  | 2.3790386 | 1.328683  |

|           |                                                                |           |           |           |
|-----------|----------------------------------------------------------------|-----------|-----------|-----------|
| NCED9     | 9-cis-epoxycarotenoid dioxygenase NCED9                        | 4.941269  | 3.7163959 | 1.3295863 |
| AT5G05600 | oxidoreductase, 2OG-Fe(II) oxygenase family protein            | 2.7006607 | 2.0252042 | 1.3335252 |
| AT3G19240 | Vacuolar import/degradation, Vid27-related protein             | 2.7784445 | 2.0789125 | 1.3364894 |
| MYB41     | myb domain protein 41                                          | 21.358395 | 15.972192 | 1.3372238 |
| AT5G12010 | hypothetical protein                                           | 3.6866632 | 2.75688   | 1.3372592 |
| AT3G12977 | no apical meristem-domain containing transcriptional regulator | 2.9508674 | 2.206649  | 1.3372618 |
| AT1G73510 | hypothetical protein                                           | 12.784129 | 9.535602  | 1.3406734 |
| NF-YC2    | nuclear transcription factor Y subunit C-2                     | 4.674577  | 3.4841218 | 1.3416802 |
| SESA1     | seed storage albumin 1                                         | 3.0451596 | 2.269434  | 1.3418145 |
| NAC046    | NAC domain containing protein 46                               | 3.6959527 | 2.7542117 | 1.3419276 |
| AT3G21660 | UBX domain-containing protein                                  | 14.320535 | 10.664126 | 1.34287   |
| MC3       | metacaspase 3                                                  | 3.0099447 | 2.2398033 | 1.3438432 |
| AT3G17770 | Dihydroxyacetone kinase                                        | 5.272687  | 3.9232934 | 1.3439441 |
| SIP4      | CBL-interacting serine/threonine-protein kinase 11             | 5.359159  | 3.9864373 | 1.344348  |
| MAP65-8   | microtubule-associated protein 65-8                            | 3.2169602 | 2.3926167 | 1.3445363 |
| AT3G22100 | transcription factor bHLH117                                   | 4.939729  | 3.67149   | 1.345429  |
| AT1G57590 | Pectin lyase-like protein                                      | 4.048264  | 3.0080192 | 1.3458239 |
| AT3G16800 | putative protein phosphatase 2C 41                             | 3.7878346 | 2.8143573 | 1.3458968 |
| AT3G08750 | F-box protein                                                  | 25.784407 | 19.140497 | 1.3471128 |
| AFP1      | Ninja-family protein AFP1                                      | 8.242834  | 6.1154766 | 1.3478645 |
| TET15     | tetraspanin15                                                  | 3.4233532 | 2.5366175 | 1.3495741 |
| CPK15     | calcium-dependent protein kinase 15                            | 4.5184917 | 3.3443966 | 1.3510634 |
| AT1G68620 | alpha/beta-hydrolase domain-containing protein                 | 3.3599057 | 2.4865115 | 1.3512528 |
| AT4G01535 | hypothetical protein                                           | 4.090873  | 3.0259984 | 1.3519086 |
| TIP2;2    | putative aquaporin TIP2-2                                      | 4.979997  | 3.681734  | 1.3526227 |
| AT1G18830 | transducin/WD-40 repeat-containing protein                     | 3.545566  | 2.6203291 | 1.3530995 |
| VHA-E2    | V-type proton ATPase subunit E2                                | 4.053068  | 2.9901192 | 1.355487  |
| AT1G80160 | lactoylglutathione lyase / glyoxalase I-like protein           | 2.8248732 | 2.078727  | 1.3589438 |
| XERO1     | dehydrin xero 1                                                | 4.9995604 | 3.6665835 | 1.3635473 |

|           |                                                                            |           |           |           |
|-----------|----------------------------------------------------------------------------|-----------|-----------|-----------|
| AT5G44310 | late embryogenesis abundant domain-containing protein                      | 2.9486415 | 2.1577263 | 1.3665503 |
| AT2G17660 | RPM1-interacting protein 4-like protein                                    | 5.1581874 | 3.7727687 | 1.3672154 |
| AT5G20690 | leucine-rich repeat protein kinase-like protein                            | 5.7099957 | 4.1738024 | 1.3680562 |
| AT3G46070 | C2H2-type zinc finger protein                                              | 3.4475856 | 2.51795   | 1.3692033 |
| AT4G02655 | hypothetical protein                                                       | 6.925421  | 5.0545588 | 1.3701336 |
| AT3G56260 | hypothetical protein                                                       | 7.0118327 | 5.116861  | 1.3703388 |
| GA2OX7    | gibberellin 2-beta-dioxygenase 7                                           | 6.182223  | 4.5108714 | 1.3705163 |
| LSU1      | response to low sulfur 1 protein                                           | 8.022602  | 5.8500137 | 1.3713819 |
| AT1G32860 | glucan endo-1,3-beta-glucosidase 11                                        | 3.3205132 | 2.4185865 | 1.3729147 |
| AT3G52060 | Core-2/I-branching beta-1,6-N-acetylglucosaminyltransferase family protein | 42.049057 | 30.565174 | 1.3757178 |
| AT5G16980 | 2-alkenal reductase                                                        | 2.9397154 | 2.1338406 | 1.377664  |
| AT1G62975 | transcription factor bHLH125                                               | 3.0153136 | 2.1886208 | 1.3777231 |
| AT3G57760 | protein kinase family protein                                              | 3.4525642 | 2.5043335 | 1.378636  |
| MAN1      | mannan endo-1,4-beta-mannosidase 1                                         | 8.835598  | 6.396333  | 1.3813535 |
| AT3G04200 | germin-like protein subfamily 1 member 6                                   | 6.383215  | 4.6198316 | 1.3816987 |
| AT5G52660 | myb family transcription factor                                            | 2.8170505 | 2.0336463 | 1.3852215 |
| BTI2      | reticulon-like protein B2                                                  | 3.9919698 | 2.881146  | 1.3855493 |
| AT1G30250 | hypothetical protein                                                       | 7.0630302 | 5.0945096 | 1.3864005 |
| MAN1      | mannan endo-1,4-beta-mannosidase 1                                         | 7.1563687 | 5.147941  | 1.3901418 |
| AT5G11410 | protein kinase family protein                                              | 2.9629235 | 2.1307383 | 1.3905619 |
| AT1G19500 | hypothetical protein                                                       | 7.39062   | 5.3138976 | 1.3908097 |
| MYB84     | transcription factor RAX3                                                  | 3.9424112 | 2.829031  | 1.3935553 |
| AT2G34360 | MATE efflux family protein                                                 | 2.9155068 | 2.0892308 | 1.395493  |
| AT3G56600 | phosphatidylinositol 3- and 4-kinase-like protein                          | 4.3211346 | 3.0882082 | 1.3992368 |
| AT2G02061 | nucleotide-diphospho-sugar transferase domain-containing protein           | 4.9957595 | 3.5681186 | 1.4001102 |
| COR413IM1 | cold regulated 314 inner membrane 1                                        | 5.4992332 | 3.9221673 | 1.4020904 |
| AT4G30830 | hypothetical protein                                                       | 7.106876  | 5.06717   | 1.4025335 |
| AT4G34400 | AP2/B3 domain-containing protein                                           | 6.012957  | 4.2786427 | 1.4053422 |
| ABI5      | protein abscisic acid-insensitive 5                                        | 4.9324985 | 3.5068018 | 1.4065518 |

|           |                                                                          |           |           |           |
|-----------|--------------------------------------------------------------------------|-----------|-----------|-----------|
| HOS3-1    | GNS1/SUR4 membrane protein                                               | 3.6023514 | 2.5604708 | 1.4069098 |
| AT5G16960 | 2-alkenal reductase                                                      | 39.47992  | 28.044939 | 1.4077377 |
| UGT76E12  | UDP-glucosyl transferase 76E12                                           | 8.623215  | 6.1214056 | 1.4086984 |
| AT5G24155 | FAD/NAD(P)-binding oxidoreductase family protein                         | 4.2844133 | 3.0365613 | 1.4109426 |
| AT1G21722 | hypothetical protein                                                     | 10.492814 | 7.4293876 | 1.4123391 |
| AT3G03341 | hypothetical protein                                                     | 42.769104 | 30.236946 | 1.4144651 |
| AT3G27025 | hypothetical protein                                                     | 7.334677  | 5.183223  | 1.4150804 |
| AT4G14730 | Bax inhibitor-1 family protein                                           | 3.7547178 | 2.6523736 | 1.4156067 |
| ABI2      | protein phosphatase 2C 77                                                | 5.8843026 | 4.1531386 | 1.4168326 |
| AT2G25890 | Oleosin-like protein                                                     | 6.4949746 | 4.574924  | 1.4196901 |
| LTI78     | low-temperature-responsive protein 78/desiccation-responsive protein 29A | 40.03432  | 28.182861 | 1.4205201 |
| MYB85     | myb domain protein 85                                                    | 3.320974  | 2.3377407 | 1.4205914 |
| BAM1      | beta-amylase 1                                                           | 7.1663666 | 5.030447  | 1.4245983 |
| ATZIP4    | ZIP4-like protein                                                        | 4.3318768 | 3.0354464 | 1.4270971 |
| ASY1      | DNA-binding HORMA-like protein                                           | 13.679837 | 9.559736  | 1.4309847 |
| NIG1      | transcription factor bHLH28                                              | 10.2736   | 7.176291  | 1.4316031 |
| AT5G35110 | hypothetical protein                                                     | 3.0541728 | 2.130992  | 1.4332166 |
| AT4G17550 | MFS transporter, OPA family, solute carrier family 37                    | 3.0122356 | 2.1005712 | 1.4340079 |
| AT1G21940 | hypothetical protein                                                     | 10.148507 | 7.0765324 | 1.4341074 |
| PDR10     | ABC transporter G family member 38                                       | 3.6513178 | 2.5436463 | 1.435466  |
| AT1G73510 | hypothetical protein                                                     | 17.931911 | 12.485918 | 1.4361707 |
| AT1G07860 | hypothetical protein                                                     | 17.35277  | 12.074489 | 1.4371432 |
| AT3G12510 | MADS-box family protein                                                  | 4.581384  | 3.1797743 | 1.4407892 |
| AT3G20340 | hypothetical protein                                                     | 4.2654023 | 2.9597483 | 1.4411368 |
| DREB2B    | dehydration-responsive element-binding protein 2B                        | 7.7986965 | 5.3975487 | 1.4448589 |
| AT1G10585 | basic helix-loop-helix domain-containing protein                         | 3.556125  | 2.458095  | 1.4466996 |
| AT2G38250 | DNA-binding protein                                                      | 3.4266055 | 2.3565593 | 1.4540715 |
| AT3G12510 | MADS-box family protein                                                  | 4.4246726 | 3.0386868 | 1.4561136 |
| JRG21     | jasmonate-regulated protein                                              | 2.937831  | 2.0153737 | 1.4577103 |

|               |                                                                           |                  |                  |           |
|---------------|---------------------------------------------------------------------------|------------------|------------------|-----------|
| AT3G14670     | hypothetical protein                                                      | 6.250919         | 4.286813         | 1.4581739 |
| MYB121        | myb proto-oncogene protein                                                | 74.905846        | 51.325943        | 1.459415  |
| AT5G62360     | plant invertase/pectin methylesterase inhibitor domain-containing protein | 3.6481657        | 2.4994216        | 1.459604  |
| AT5G16360     | NC domain-containing protein-like protein                                 | 4.5939484        | 3.1471608        | 1.4597121 |
| FLA14         | fasciclin-like arabinogalactan protein 14                                 | 29.014442        | 19.86224         | 1.4607841 |
| AT3G61900     | SAUR-like auxin-responsive protein                                        | 4.8273764        | 3.2978225        | 1.4638072 |
| AT4G12005     | hypothetical protein                                                      | 4.5561633        | 3.1072395        | 1.4663059 |
| CYP94B3       | cytochrome P450, family 94, subfamily B, polypeptide 3                    | 7.3077326        | 4.982819         | 1.466586  |
| CBF1          | dehydration-responsive element-binding protein 1B                         | 8.474016         | 5.7684813        | 1.4690204 |
| AT3G12977     | no apical meristem-domain containing transcriptional regulator            | 2.9781435        | 2.0259058        | 1.4700307 |
| SVL3          | protein SEUSS-like 3                                                      | 11.535331        | 7.8440185        | 1.4705895 |
| AT1G70640     | octicosapeptide/Phox/Be.1 domain-containing protein                       | 33.39988         | 22.6809          | 1.4725993 |
| CYP89A6       | cytochrome P450, family 87, subfamily A, polypeptide 6                    | 5.053147         | 3.4141498        | 1.4800601 |
| MYB102        | MYB-like 102                                                              | 10.73974         | 7.2555337        | 1.4802136 |
| AT2G13640     | transcription factor IIS-like protein                                     | 12.099832        | 8.16726          | 1.4815043 |
| UPS4          | ureide permease 4                                                         | 6.290484         | 4.2409086        | 1.4832869 |
| AT2G31930     | hypothetical protein                                                      | 3.276021         | 2.2051055        | 1.4856527 |
| AT5G52940     | hypothetical protein                                                      | 4.2895584        | 2.8790214        | 1.4899362 |
| EM1           | Em-like protein GEA1                                                      | 4.076982         | 2.7361567        | 1.4900397 |
| AT2G31940     | hypothetical protein                                                      | 7.3791823        | 4.951629         | 1.4902534 |
| ERD2          | heat shock protein-70 cognate protein                                     | 3.422777         | 2.295            | 1.491406  |
| <b>RAP2.6</b> | <b>ethylene-responsive transcription factor RAP2-6</b>                    | <b>4.1466317</b> | <b>2.7714522</b> | 1.4961946 |
| BOR4          | boron transporter 4                                                       | 12.349424        | 8.227757         | 1.5009466 |
| CYP72A9       | cytochrome P450, family 72, subfamily A, polypeptide 9                    | 5.6798587        | 3.761273         | 1.5100895 |
| AT3G15200     | pentatricopeptide repeat-containing protein                               | 3.095525         | 2.0426583        | 1.5154395 |
| AT1G16515     | hypothetical protein                                                      | 4.3544683        | 2.872668         | 1.5158272 |
| AT5G45630     | hypothetical protein                                                      | 7.229941         | 4.7679477        | 1.5163634 |
| CIPK19        | CBL-interacting serine/threonine-protein kinase 19                        | 13.173505        | 8.676855         | 1.518235  |
| AT3G27025     | hypothetical protein                                                      | 8.031424         | 5.28716          | 1.5190431 |

|           |                                                                           |           |           |           |
|-----------|---------------------------------------------------------------------------|-----------|-----------|-----------|
| AT3G17130 | plant invertase/pectin methylesterase inhibitor domain-containing protein | 4.3692636 | 2.8723989 | 1.5211201 |
| AT5G42053 | hypothetical protein                                                      | 4.0707297 | 2.675913  | 1.5212487 |
| AT1G76530 | auxin efflux carrier-like protein                                         | 3.7658942 | 2.4731598 | 1.5227056 |
| NAC080    | NAC domain containing protein 80                                          | 6.540648  | 4.29086   | 1.524321  |
| DGK2      | diacylglycerol kinase 2                                                   | 3.2300851 | 2.1159668 | 1.5265293 |
| AT1G69480 | phosphate transporter PHO1-10                                             | 7.938423  | 5.1905036 | 1.529413  |
| CDT1      | cadmium tolerance 1                                                       | 3.4548404 | 2.253353  | 1.5331998 |
| AT2G04190 | TRAF-like family protein                                                  | 6.241515  | 4.061037  | 1.5369264 |
| SAG29     | senescence-associated protein 29                                          | 4.159686  | 2.7001376 | 1.540546  |
| AT4G21930 | hypothetical protein                                                      | 17.028833 | 11.052691 | 1.5406957 |
| APX1      | L-ascorbate peroxidase                                                    | 3.2338538 | 2.0928485 | 1.5451926 |
| AT2G17660 | RPM1-interacting protein 4-like protein                                   | 5.285411  | 3.4177897 | 1.5464412 |
| MYB107    | myb domain protein 107                                                    | 4.867742  | 3.1425166 | 1.5489949 |
| KNAT3     | homeobox protein knotted-1-like 3                                         | 10.234946 | 6.5986586 | 1.5510646 |
| AT1G57850 | Toll-Interleukin-Resistance domain-containing protein                     | 8.089746  | 5.210834  | 1.5524858 |
| AT3G27210 | hypothetical protein                                                      | 3.2977266 | 2.1232457 | 1.5531536 |
| AT1G55240 | hypothetical protein                                                      | 3.3325162 | 2.1442406 | 1.5541708 |
| RAS1      | response to ABA and salt 1                                                | 6.0293117 | 3.8519757 | 1.5652517 |
| AT1G29680 | hypothetical protein                                                      | 28.237911 | 18.010012 | 1.5679008 |
| FBW2      | F-box protein FBW2                                                        | 3.3434107 | 2.129072  | 1.5703605 |
| AT3G62730 | hypothetical protein                                                      | 5.2821383 | 3.356498  | 1.5737052 |
| AT5G24080 | protein kinase family protein                                             | 27.669205 | 17.532507 | 1.5781659 |
| MSL5      | mechanosensitive channel of small conductance-like 5                      | 6.357161  | 4.023804  | 1.5798882 |
| AT2G34610 | hypothetical protein                                                      | 7.321857  | 4.630152  | 1.5813426 |
| HSFA6B    | heat stress transcription factor A-6b                                     | 3.1913033 | 2.0109563 | 1.5869582 |
| PDR11     | ABC transporter G family member 39                                        | 3.2026644 | 2.017856  | 1.5871621 |
| AT4G30830 | hypothetical protein                                                      | 6.251365  | 3.9357727 | 1.588345  |
| AT2G33280 | major facilitator protein                                                 | 6.872174  | 4.323966  | 1.5893217 |
| AT1G62320 | ERD (early-responsive to dehydration stress) family protein               | 3.5254471 | 2.2053263 | 1.5986056 |



|           |                                                                           |           |           |           |
|-----------|---------------------------------------------------------------------------|-----------|-----------|-----------|
| AT1G05340 | hypothetical protein                                                      | 4.993011  | 3.1143792 | 1.6032122 |
| AT1G14048 | GCK domain-containing protein                                             | 4.39448   | 2.7285247 | 1.6105702 |
| P5CS1     | Gamma-glutamyl phosphate reductase                                        | 28.83455  | 17.824625 | 1.6176807 |
| AT1G19490 | bZIP transcription factor-like protein                                    | 4.0224957 | 2.4864063 | 1.6177951 |
| RNS1      | ribonuclease I                                                            | 3.2753043 | 2.0114527 | 1.6283277 |
| AT1G56660 | hypothetical protein                                                      | 3.8419716 | 2.350414  | 1.6345935 |
| AT2G01300 | hypothetical protein                                                      | 5.3740425 | 3.268434  | 1.6442255 |
| AT3G23220 | ethylene-responsive transcription factor ERF095                           | 4.2497444 | 2.5539305 | 1.6640016 |
| AT1G15010 | hypothetical protein                                                      | 3.8125608 | 2.2887805 | 1.6657608 |
| AT5G03210 | hypothetical protein                                                      | 21.69327  | 12.97107  | 1.6724349 |
| RRTF1     | ethylene-responsive transcription factor ERF109                           | 6.654209  | 3.9599447 | 1.6803793 |
| AT4G21926 | hypothetical protein                                                      | 4.164758  | 2.4706843 | 1.68567   |
| AT3G13130 | hypothetical protein                                                      | 4.610067  | 2.7076697 | 1.7025958 |
| AT3G50373 | hypothetical protein                                                      | 4.856672  | 2.8348396 | 1.7132088 |
| NAMT1     | S-adenosyl-L-methionine-dependent methyltransferase-like protein          | 5.6540337 | 3.2949603 | 1.7159641 |
| AT5G39560 | F-box/kelch-repeat protein                                                | 8.194002  | 4.7654805 | 1.7194494 |
| AT1G76965 | hypothetical protein                                                      | 11.157238 | 6.4663954 | 1.7254184 |
| AT2G33690 | Late embryogenesis abundant protein, group 6                              | 5.1374893 | 2.9766388 | 1.7259364 |
| AT1G77680 | Ribonuclease II/R-like protein                                            | 4.6789036 | 2.6460967 | 1.7682285 |
| CYP72A13  | cytochrome P450, family 72, subfamily A, polypeptide 13                   | 7.0993257 | 3.9592865 | 1.7930821 |
| AT3G53040 | putative late embryogenesis abundant protein                              | 5.4607406 | 3.0329754 | 1.8004568 |
| AT5G43285 | defensin-like protein 217                                                 | 4.8080454 | 2.6312218 | 1.8273052 |
| AT5G62360 | plant invertase/pectin methylesterase inhibitor domain-containing protein | 4.706977  | 2.5645268 | 1.8354174 |
| AT5G62360 | plant invertase/pectin methylesterase inhibitor domain-containing protein | 4.749228  | 2.5422428 | 1.8681254 |
| AT1G80133 | epidermal patterning factor-like protein 8                                | 4.2646356 | 2.2712288 | 1.8776776 |
| NAC080    | NAC domain containing protein 80                                          | 9.045411  | 4.7808905 | 1.8919928 |
| SIP1      | putative galactinol--sucrose galactosyltransferase 5                      | 7.5245953 | 3.9636688 | 1.8983915 |
| SPS2F     | sucrose phosphate synthase 2F                                             | 6.4162793 | 3.3616407 | 1.908675  |
| AT3G09440 | protein heat shock protein 70-3                                           | 4.013204  | 2.097905  | 1.9129581 |

|           |                                                                           |           |           |           |
|-----------|---------------------------------------------------------------------------|-----------|-----------|-----------|
| CBF4      | dehydration-responsive element-binding protein 1D                         | 31.357681 | 16.305992 | 1.9230771 |
| AT5G62360 | plant invertase/pectin methylesterase inhibitor domain-containing protein | 4.368792  | 2.23942   | 1.9508588 |
| HSP90.1   | heat shock protein 81-1                                                   | 4.804528  | 2.4238973 | 1.9821502 |
| AT4G18650 | transcription factor-related protein                                      | 8.718043  | 4.386015  | 1.9876912 |
| AT1G30250 | hypothetical protein                                                      | 4.0762215 | 2.0505886 | 1.9878298 |

**Supplementary Data S6.** Categorization and abundance of degradome reads from the WT+S (wild-type Col-0, NaCl-free), MIR5-S (*35S::miRNVL5*, NaCl-free) and MIR5+S (*35S::miRNVL5*, NaCl-treated) libraries of wild-type and transgenic plants over-expressing miRNVL5.

Clean reads are those after removal of low quality reads from raw data.

|                         |                                 | WT+S     | MIR5-S   | MIR5+S   |
|-------------------------|---------------------------------|----------|----------|----------|
| Raw reads               | Total                           | 30469415 | 24932306 | 27299578 |
| Clean reads             | Total                           | 30200852 | 24739290 | 27064875 |
|                         | Distinct reads                  | 6682605  | 7785259  | 6118742  |
| Reads mapping to cDNA   | cDNA sense                      | 17971327 | 16612018 | 17491882 |
|                         | cDNA antisense                  | 323197   | 374907   | 224288   |
|                         | Total number                    | 18294524 | 16986925 | 17716170 |
|                         | Total % of clean reads          | 60.58%   | 68.66%   | 65.46%   |
|                         | Distinct reads number           | 3734847  | 5266712  | 3641861  |
|                         | Distinct reads % of clean reads | 55.89%   | 67.65%   | 59.52%   |
| Reads mapping to Genome | Total number                    | 24750367 | 22232483 | 22361737 |
|                         | Total % of clean reads          | 81.95%   | 89.87%   | 82.62%   |
|                         | Distinct read number            | 4715269  | 6506758  | 4405498  |
|                         | Distinct reads % of clean reads | 70.56%   | 83.58%   | 72.00%   |

**Supplementary Data S7.** The number of differentially expressed genes in differential expression libraries as assessed by microarray.

| Treatments/Control | Number of up-regulated genes | Number of down-regulated genes |
|--------------------|------------------------------|--------------------------------|
| miR5+S/Col-0+S     | 760                          | 861                            |
| miR5+S/Col-0-S     | 3206                         | 2938                           |
| miR5+S/miR5-S      | 2628                         | 2442                           |
| miR5-S/Col-0-S     | 508                          | 441                            |
| Col-0+S/Col-0-S    | 2815                         | 2388                           |

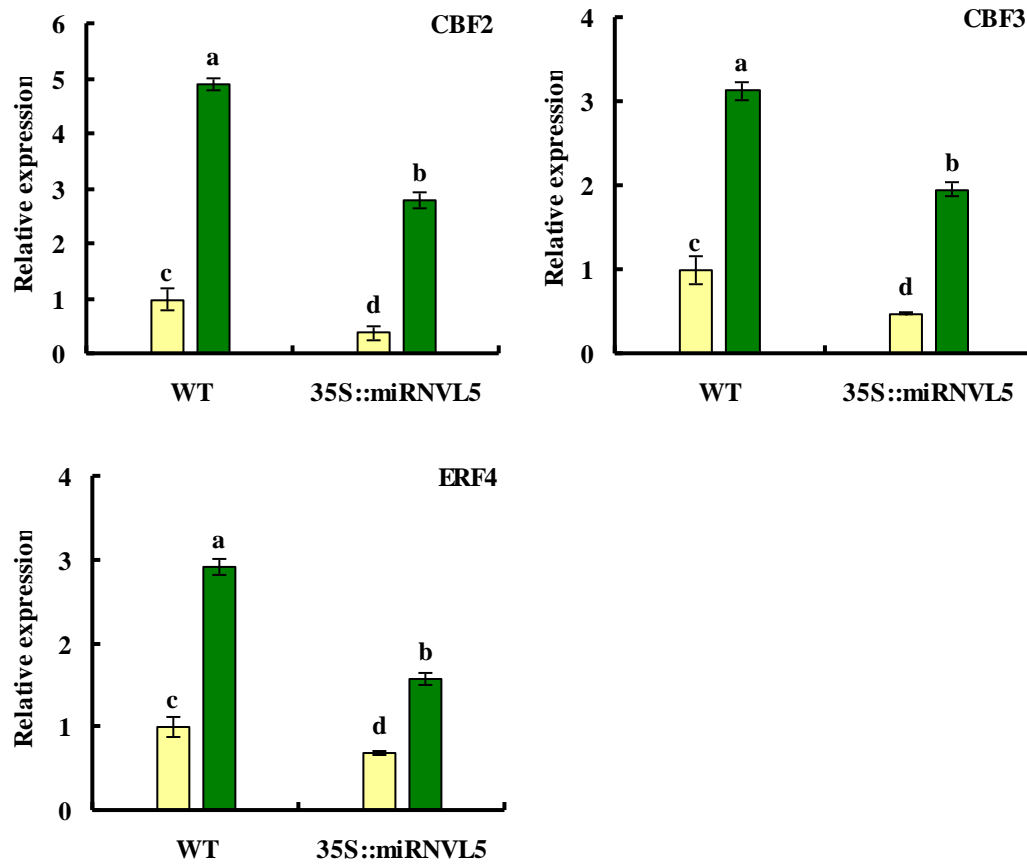

**Supplementary Data S8.** Validation of selected genes from microarray using qRT-PCR. Three week-old wild-type (WT) and *35S::miRNVL5*

seedlings were treated with 200 mM NaCl exposure for 1 h. Vertical bars represent SD of the mean with three replicates. Data with different letters are significant different ( $p < 0.05$ ).

**Supplementary Data S9. Genes co-expressed with At2g44380**

|    |      |            |                                                   |
|----|------|------------|---------------------------------------------------|
| 1  | 0.68 | At2g44370* | Cysteine/Histidine-rich C1 domain family protein  |
| 2  | 0.61 | At2g27660  | Cysteine/Histidine-rich C1 domain family protein  |
| 4  | 0.59 | At1g51850  | Leucine-rich repeat protein kinase family protein |
| 5  | 0.57 | At3g55150  | exocyst subunit exo70 family protein H1           |
| 5  | 0.54 | At2g42350  | RING/U-box superfamily protein                    |
| 6  | 0.59 | At1g51790  | Leucine-rich repeat protein kinase family protein |
| 8  | 0.58 | At5g64100  | Peroxidase superfamily protein                    |
| 10 | 0.51 | At5g43520  | Cysteine/Histidine-rich C1 domain family protein  |
| 10 | 0.55 | At2g39530  | Uncharacterised protein family (UPF0497)          |
| 10 | 0.55 | At3g51330* | Eukaryotic aspartyl protease family protein       |
| 11 | 0.53 | At2g44790  | uclacyanin 2                                      |

|    |      |             |                                                                         |
|----|------|-------------|-------------------------------------------------------------------------|
| 11 | 0.51 | At2g39380   | exocyst subunit exo70 family protein H2                                 |
| 12 | 0.51 | At5g44910   | Toll-Interleukin-Resistance (TIR) domain family protein                 |
| 12 | 0.53 | At3g46280   | protein kinase-related                                                  |
| 12 | 0.48 | At3g46690** | UDP-Glycosyltransferase superfamily protein                             |
| 12 | 0.5  | At2g36690   | 2-oxoglutarate (2OG) and Fe(II)-dependent oxygenase superfamily protein |
| 12 | 0.51 | At5g48430   | Eukaryotic aspartyl protease family protein                             |
| 13 | 0.54 | At1g02360   | Chitinase family protein                                                |
| 14 | 0.42 | At4g32870** | Polyketide cyclase/dehydrase and lipid transport superfamily protein    |
| 15 | 0.54 | At1g52200   | PLAC8 family protein                                                    |
| 16 | 0.5  | At5g24230   | Lipase class 3-related protein                                          |
| 16 | 0.49 | At3g02240   |                                                                         |
| 18 | 0.49 | At5g53110   | RING/U-box superfamily protein                                          |



|    |      |             |                                                          |
|----|------|-------------|----------------------------------------------------------|
| 18 | 0.48 | At1g51860   | Leucine-rich repeat protein kinase family protein        |
| 20 | 0.51 | At5g44380   | FAD-binding Berberine family protein                     |
| 22 | 0.47 | At4g32650   | potassium channel in Arabidopsis thaliana 3              |
| 22 | 0.51 | At2g44010   |                                                          |
| 22 | 0.38 | At4g40070** | RING/U-box superfamily protein                           |
| 25 | 0.47 | At3g03000** | EF hand calcium-binding protein family                   |
| 25 | 0.4  | At2g29740   | UDP-glucosyl transferase 71C2                            |
| 25 | 0.47 | At1g03850   | Glutaredoxin family protein                              |
| 25 | 0.47 | At3g45410** | Concanavalin A-like lectin protein kinase family protein |
| 26 | 0.49 | At4g18430   | RAB GTPase homolog A1E                                   |
| 26 | 0.44 | At5g67450   | zinc-finger protein 1                                    |
| 27 | 0.46 | At4g01720   | WRKY family transcription factor                         |
| 28 | 0.43 | At1g78000   | sulfate transporter 1;2                                  |
| 29 | 0.5  | At1g51800   | Leucine-rich repeat protein kinase family protein        |

|    |      |             |                                                         |
|----|------|-------------|---------------------------------------------------------|
| 29 | 0.39 | At5g06570   | alpha/beta-Hydrolases superfamily protein               |
| 31 | 0.49 | At2g39200   | Seven transmembrane MLO family protein                  |
| 32 | 0.39 | At1g30110   | nudix hydrolase homolog 25                              |
| 33 | 0.43 | At4g16350   | calcineurin B-like protein 6                            |
| 33 | 0.47 | At2g42060   | Cysteine/Histidine-rich C1 domain family protein        |
| 35 | 0.4  | At1g14780   | MAC/Perforin domain-containing protein                  |
| 35 | 0.4  | At2g29995   |                                                         |
| 36 | 0.46 | At5g64120   | Peroxidase superfamily protein                          |
| 37 | 0.46 | At2g35000** | RING/U-box superfamily protein                          |
| 37 | 0.34 | At1g13100** | cytochrome P450, family 71, subfamily B, polypeptide 29 |
| 37 | 0.44 | At1g17860   | Kunitz family trypsin and protease inhibitor protein    |
| 38 | 0.39 | At1g22500   | RING/U-box superfamily protein                          |
| 40 | 0.5  | At5g63600   | flavonol synthase 5                                     |
| 42 | 0.45 | At1g65610   | Six-hairpin glycosidases superfamily protein            |

|    |      |             |                                                              |
|----|------|-------------|--------------------------------------------------------------|
| 43 | 0.48 | At1g30700** | FAD-binding Berberine family protein                         |
| 43 | 0.41 | At4g11530   | cysteine-rich RLK (RECEPTOR-like protein kinase) 34          |
| 43 | 0.49 | At4g20110   | VACUOLAR SORTING RECEPTOR 7                                  |
| 45 | 0.47 | At1g29280   | WRKY DNA-binding protein 65                                  |
| 47 | 0.47 | At2g21045   | Rhodanese/Cell cycle control phosphatase superfamily protein |
| 49 | 0.45 | At4g25110   | metacaspase 2                                                |
| 50 | 0.47 | At3g09490   | Tetratricopeptide repeat (TPR)-like superfamily protein      |

\*genes that are predicted to interact with At2g44380

\*\*genes that do not participate in the network

**Supplementary Data S10. Primers used for this study by RT-PCR**

| Genes                       | Primers                                                                                     |
|-----------------------------|---------------------------------------------------------------------------------------------|
| Cotton-18S                  | F: 5' - TGAGAAACGGCTACCACA -3'<br>R: 5' - ACCCACCTAAGTCCAAC -3'                             |
| (q)RT-Pre-miRNVL5           | F: 5' - GATCTGGGCTTGGGTGCCTATAAAAT -3'<br>R: 5' - AATAAAGCAGTACGCAGCACA -3'                 |
| 5TF                         | 5' - GAAGATCTATGGAGGAGTCTAACAATTA -3'                                                       |
| 5TR                         | 5' -GGACTAGTTTACATGCGCCACCACAAAA -3'                                                        |
| 5MF                         | 5' - GCTCTAGAGATCTGGGCTTGGGTGCCT -3'                                                        |
| 5MR<br>(GhCHR cDNA cloning) | 5' - TCCCCGGGGAGGCAAAGATAATAAAG -3'                                                         |
| RT- GhCHR                   | F: 5' - TCATCAAAGCAAGTGGCA -3'<br>R: 5' - CTGAAATAAGGGCAAGAGGTT -3'                         |
| GhUB2                       | F: 5' - CAAGGAGGGTATCCCCCA -3'<br>R: 5' - GCAGCCGCAACACCAAGTG -3'                           |
| qRT- GhCHR                  | F: 5' - CTTCTTCACTCACTGCTCATA -3'<br>R: 5' - CCAACGATTTGTATCTCGACTT -3'                     |
| 3'-RACE-Adapt               | 5' - GCGAGCACAGAATTAATACGACTCACTATAGGTTTTTTTTTTTTVN -3'                                     |
| qRT-miRNVL5                 | 5' - TTTCTTCACAAATATCACAATA -3'                                                             |
| 3'-Outer                    | 5' - GCGAGCACAGAATTAATACGACT -3'                                                            |
| Pre-miRNVL5                 | F: 5' - GCTCTAGAGATCTGGGCTTGGGTGCCT -3'<br>R: 5' - TCCCCGGGGAGGCAAAGATAATAAAG -3'           |
| ORF-GhCHR                   | F: 5' - GCTCTAGAATGGAGGAGTCTAACAATTATGGCC -3'<br>R: 5' - CGAGCTCTTACATGCGCCACCACAAAAAAC -3' |

|            |                                                                                                                      |
|------------|----------------------------------------------------------------------------------------------------------------------|
| mGhCHR     | F: 5'- AGTCATTACTGTGACATCTGCGAGGAGAGTCGAGATACAAATCGT -3'<br>R: 5'- TCTCGACTCTCCTCGCAGATGTCACAGTAATGACTTTCTAAATAT -3' |
| pBI121(JD) | 5'- GCGAGAAAGGAAGGGAAGAAA -3'                                                                                        |
| Actin2     | F: 5'- CATCAGGAAGGACTTGTACGG -3'<br>R: 5'- GATGGACCTGACTCGTCATAC -3'                                                 |
| qRT-RD29A  | F: 5'- GTTACTGATCCCACCAAAGAAGA -3'<br>R: 5'- GGAGACTCATCAGTCACTTCCA -3'                                              |
| qRT-RD22   | F: 5'- AGGGCTGTTTCCACTGAGG -3'<br>R: 5'- CACCACAGATTTATCGTCAGACA -3'                                                 |
| qRT-KIN1   | F: 5'- TGGAGCTGGAGCACAACA -3'<br>R: 5'- GACCCGAATCGCTACTTGTTT -3'                                                    |
| qRT-SOS1   | F: 5'- CACTTCTGGGAAATGGTTGCA -3'<br>R: 5'- TGCCTTCAGCAATGACAACAC -3'                                                 |
| qRT-NHX1   | F: 5'- GTATGGATTTTGGGGTGTGTCATCA -3'<br>R: 5'- CAGCACAGTGGTGTGTTGGTATGCT -3'                                         |
| qRT-AVP1   | F: 5'- GGGTCAAAACATCTACGGTGTGGAT -3'<br>R: 5'- GGAAACACCACTGCTGCTATTGGAA -3'                                         |
| qRT-P5CS1  | F: 5'- AGCAGCCTGTAATGCGATGG -3'<br>R: 5'- AAGTGACGCCTTTGGTTTGC -3'                                                   |
| qRT-CBF1   | F: 5'- GCATGTCTCAACTTCGCTGA -3'<br>R: 5'- ATCGTCTCCTCCATGTCCAG -3'                                                   |
| qRT-CBF2   | F: 5'- TGACGTGTCCTTATGGAGCTA -3'<br>R: 5'- CTGCACTCAAAAACATTTGCA -3'                                                 |
| qRT-CBF3   | F: 5'- GATGACGACGTATCGTTATGGA -3'<br>R: 5'- TACTCGTTTCTCAGTTTTTACAAAC -3'                                            |
| qRT-ERF4   | F: 5'- TCAGCCTCCTCCTGTGACATC -3'<br>R: 5'- ACGACCGATGACGAATCAGAGT -3'                                                |

|               |                                                                      |
|---------------|----------------------------------------------------------------------|
| qRT-AT3G22920 | F: 5'- CGTTGTGATCGGCAAAGTTGTT -3'<br>R: 5'- GCGTCCTTGTTGTCGTAGTT -3' |
| qRT-AT3G49200 | F: 5'- CATAGAGAACGCAAACGCAGAC -3'<br>R: 5'- CGGCTTGGAGGTGTCTAACG -3' |
